# Supplementary material for: Prevalence and correlates of smoking and nicotine dependence: results of a nationwide cross-sectional survey among Singapore residents
Source: PubMed Central journal article supplement — BMJ Open. 2019 Oct 18;9(10):e032198. doi: 10.1136/bmjopen-2019-032198 (PMC6803088; doi:10.1136/bmjopen-2019-032198), 2019-10-18
Supplement: bmjopen-2019-032198.draft_revisions.pdf [file bmjopen-2019-032198.draft_revisions.pdf]

# BMJ Open

BMJ Open is committed to open peer review. As part of this commitment we make the peer review history of every article we publish publicly available.

When an article is published we post the peer reviewers' comments and the authors' responses online. We also post the versions of the paper that were used during peer review. These are the versions that the peer review comments apply to.

The versions of the paper that follow are the versions that were submitted during the peer review process. They are not the versions of record or the final published versions. They should not be cited or distributed as the published version of this manuscript.

BMJ Open is an open access journal and the full, final, typeset and author-corrected version of record of the manuscript is available on our site with no access controls, subscription charges or pay-per-view fees (<http://bmjopen.bmj.com>).

If you have any questions on BMJ Open's open peer review process please email [info.bmjopen@bmj.com](mailto:info.bmjopen@bmj.com)

# BMJ Open

## Prevalence and correlates of smoking and nicotine dependence among Singapore residents

|                               |                                                                                                                                                                                                                                                                                                                                                                                                                                                                                                                                                                                                                                                                                                                                                                                                   |
|-------------------------------|---------------------------------------------------------------------------------------------------------------------------------------------------------------------------------------------------------------------------------------------------------------------------------------------------------------------------------------------------------------------------------------------------------------------------------------------------------------------------------------------------------------------------------------------------------------------------------------------------------------------------------------------------------------------------------------------------------------------------------------------------------------------------------------------------|
| Journal:                      | <i>BMJ Open</i>                                                                                                                                                                                                                                                                                                                                                                                                                                                                                                                                                                                                                                                                                                                                                                                   |
| Manuscript ID                 | bmjopen-2019-032198                                                                                                                                                                                                                                                                                                                                                                                                                                                                                                                                                                                                                                                                                                                                                                               |
| Article Type:                 | Research                                                                                                                                                                                                                                                                                                                                                                                                                                                                                                                                                                                                                                                                                                                                                                                          |
| Date Submitted by the Author: | 07-Jun-2019                                                                                                                                                                                                                                                                                                                                                                                                                                                                                                                                                                                                                                                                                                                                                                                       |
| Complete List of Authors:     | Shahwan, Shazana; Institute of Mental Health, Research Division<br>Abdin , Edimansyah ; Institute of Mental Health, Research Division<br>Shafie, Saleha; Institute of Mental Health, Research Division<br>Chang, Sherilyn; Institute of Mental Health, Research Division<br>Sambasivam, Rajeswari; Institute of Mental Health, Research Division<br>Zhang, Yun-jue; Institute of Mental Health, Research Division<br>Vaingankar, Janhavi; Institute of Mental Health, Research Division<br>Teo, Yik Ying; National University of Singapore, Saw Swee Hock School of Public Health<br>Heng, Derrick; Government of Singapore Ministry of Health, Public Policy<br>Chong, Siow Ann ; Institute of Mental Health, Research Division<br>Subramaniam, M; Institute of Mental Health, Research Division |
| Keywords:                     | Public health < INFECTIOUS DISEASES, Epidemiology < TROPICAL MEDICINE, MENTAL HEALTH                                                                                                                                                                                                                                                                                                                                                                                                                                                                                                                                                                                                                                                                                                              |
|                               |                                                                                                                                                                                                                                                                                                                                                                                                                                                                                                                                                                                                                                                                                                                                                                                                   |

SCHOLARONE™  
Manuscripts

1  
2  
3 Title: Prevalence and correlates of smoking and nicotine dependence among Singapore residents  
4  
5

6 Shazana Shahwan<sup>1a</sup>, Edimansyah Abdin<sup>1</sup>, Saleha Shafie<sup>1</sup>, Sherilyn Chang<sup>1</sup>, Rajeswari Sambasivam<sup>1</sup>,  
7  
8 Yun Jue Zhang<sup>1</sup>, Janhavi Vaingankar<sup>1</sup>, Yik Ying Teo<sup>2</sup>, Derrick Heng<sup>3</sup>, Siow Ann Chong<sup>1</sup>, Mythily  
9  
10 Subramaniam<sup>1</sup>  
11  
12  
13  
14  
15

16  
17 <sup>1</sup>Research Division, Institute of Mental Health, Singapore

18 <sup>2</sup>Saw Swee Hock School of Public Health, National University of Singapore

19 <sup>3</sup>Public Policy, Ministry of Health, Singapore  
20  
21  
22

23  
24 <sup>a</sup>Corresponding author

25  
26 Email address: [shazana\\_mohamed\\_shahwan@imh.com.sg](mailto:shazana_mohamed_shahwan@imh.com.sg)

27  
28 Postal address: Buangkok Green Medical Park, 10 Buangkok View, Singapore 793747

29  
30 Tel: +65 6389 1924

31  
32 Fax: +65 6389 2795  
33  
34  
35  
36  
37  
38  
39  
40  
41  
42  
43  
44  
45  
46  
47  
48  
49  
50  
51  
52  
53  
54  
55  
56  
57  
58  
59  
60

Keywords: smoking, nicotine dependence, correlates, prevalence, psychiatric

Word count: 2966 words

Number of references: 33

## Abstract

Background: Since the Singapore Mental Health Study in 2010 which reported a 16% prevalence rate for current smokers and 4.5% for nicotine-dependence, new anti-smoking strategies have been implemented. The aim of this study was to compare smoking trends from the 2010 study with the second Singapore Mental Health Study in 2016 (SMHS 2016).

Methods: A household survey with 6126 residents was conducted using the same methodology as the 2010 study. The measures used in this analysis were sociodemographic questions, the Composite International Diagnostic Interview which assessed for psychiatric disorders, The Fagerstrom Test for Nicotine Dependence, and a list of chronic physical conditions which are prevalent in Singapore. Logistic regression analyses were used to test for associations between smoking/nicotine-dependence and other measures.

Results: In the SMHS 2016, 16% were current smokers and 3.3% were nicotine-dependent. As compared to non-smokers, current smokers were more likely to be of ethnic minority, male, divorced/separated (compared to married), and of lower/vocational education level. Male gender, lower/vocational education and psychiatric disorders (major depression, bipolar disorder and alcohol use disorders) predicted nicotine dependence. No associations were found between nicotine dependence and any of the chronic conditions.

Conclusion: The prevalence of current smokers in the population has plateaued while that of nicotine dependence has decreased from 2010. Inequalities in smoking and nicotine dependence continue to pervade the population particularly among those of ethnic minority, lower/vocational education and the mentally ill calling for strategies that move beyond raising cigarette prices and anti-smoking policies/campaigns that may further isolate stigmatised groups.

### Strengths and limitations of this study

- The study reports the prevalence and correlates of smoking and nicotine dependence based on a large representative sample of the Singapore population.
- The same methodology and instruments employed in the 2010 study was applied allowing direct comparisons with the earlier study.
- The study did not assess for alternative forms of smoking such as e-cigarettes that is gaining popularity.
- Reliance on self-report could lead to an underestimation of the true prevalence of nicotine dependence and associations with mental and medical conditions

## Prevalence and correlates of smoking and nicotine dependence among Singapore residents

Cigarette smoking is a leading cause of preventable death worldwide [1]. Smoking-related diseases contribute significantly to the global rise in incidence of non-communicable diseases in both developed and developing countries [2]. Smoking ranks high among public health problems in the world, with an estimated 7.4-9.7 million tobacco-attributable deaths by 2030 [3].

In 2003, the World Health Assembly adopted the Framework Convention on Tobacco Control (FCTC) to take steps to reduce both the supply of and demand for tobacco products. This treaty is now ratified by 181 countries[2]. To help those countries fulfil their commitment to the FCTC, the WHO disseminated recommendations consisting of six strategies: monitor tobacco use; protect people from tobacco smoke; offer help to quit tobacco use; warn about the dangers of tobacco; enforce bans on tobacco advertising, promotion and sponsorship; and raise taxes on tobacco. Steady decline in smoking prevalence rates have been seen in countries such as New Zealand [4], Turkey, and Sweden [5] since the implementation of FCTC strategies.

However, these changes have not occurred uniformly across all population groups. Disparities in smoking prevalence are widening. In the United States, for example, less than 20% of those at or above the poverty level smoke compared with 30% of those below the poverty level. Other socioeconomic measures associated with inequalities in smoking include education, income, and neighbourhood deprivation [6]. The higher prevalence of smoking in individuals from lower SES groups is the single most important cause of socioeconomic differences in mortality (Stringhini et al., 2010).

Another subpopulation with exceptionally high rates of smoking internationally is individuals with mental illness. Individuals with mental illness smoke at rates approximately twice that of adults without mental disorders [9]. Smoking is believed to account for the majority of excess mortality among individuals with serious mental illness [10]. Life expectancy among people with severe mental illness is 25 years less than that among the general population [11]. Monitoring trends in the

1  
2  
3 population and between subgroups aids countries in taking necessary corrections or new actions for  
4 tobacco control.  
5  
6

7  
8 Singapore is city-state located in the South-east Asia with a multi-ethnic population and was  
9 among the first 40 countries to ratify the FCTC. It exercises stringent smoking policies and extensive  
10 regulations on the demand and supply of tobacco [12]. In the nation-wide Singapore Mental Health  
11 Study conducted in 2010, (SMHS 2010), Picco et al. (2012) reported local smoking prevalence rates  
12 of 16%. Smokers were more likely to be of younger age, males, Malay ethnicity and have lower  
13 education. Prevalence of nicotine dependence was higher in those with alcohol abuse and those  
14 experiencing chronic pain. Singapore aims to lower smoking prevalence rates to 12 per cent by 2020  
15 through a multipronged strategy composed of preventing initiation among the youth, public education  
16 and specific programs for target groups, and providing more support and access to smoking cessation  
17 programs [14].  
18  
19  
20  
21  
22  
23  
24  
25  
26  
27  
28

29  
30 The purpose of this study was to compare and contrast smoking trends from the 2010 study  
31 with the second Singapore Mental Health Study which began in 2016 (SMHS 2016). As stricter anti-  
32 smoking laws (e.g. raising minimum smoking age to 21years, expanding smoke-free zones) and new  
33 campaigns were launched after 2010, we hypothesize that there will be a decline in the prevalence of  
34 smoking and nicotine dependence in the SMHS 2016. This study also examined sociodemographic  
35 risk factors of smoking and nicotine dependence as well as the association of nicotine dependence  
36 with lifetime psychiatric and physical disorders.  
37  
38  
39  
40  
41  
42  
43  
44

## 45 Methods

### 46 Participants and Procedure

47  
48 The SMHS 2016 was conducted following the same procedures as the SMHS 2010. This  
49 population-based, cross-sectional study included Singapore citizens and permanent residents aged 18  
50 years and above living in Singapore. The sampling frame was based on a national population registry  
51 of all citizens and permanent residents in Singapore, and is updated regularly.  
52  
53  
54  
55  
56  
57  
58  
59  
60

1  
2  
3 An invitation letter was sent to each respondent followed by a personal home visit by a  
4 trained interviewer to obtain his/her agreement to participate in the survey. Trained interviewers from  
5 a survey research company conducted face-to-face interviews with those who agreed to participate in  
6 the study. The questionnaires were available in English, Chinese and Malay. Residents who were  
7 incapable of doing an interview due to severe physical/mental conditions, language barriers; were  
8 living outside the country, institutionalized/hospitalized, and those who were not contactable due to  
9 incomplete/ incorrect address, were excluded from the survey. Consent was obtained from all  
10 participants prior to commencement of any study procedure. Parental consent was also obtained for  
11 minors aged 18-20 years.  
12  
13  
14  
15  
16  
17  
18  
19  
20  
21

## 22 Measures

23  
24  
25 **Sociodemographic information:** Data on gender, age groups (18–34, 35–49, 50–64, and  $\geq 65$  years),  
26 ethnicity (Chinese, Malay, Indian, and Others), marital status (single, married, divorced/ separated or  
27 widowed), educational level (primary and below, secondary, vocational institute, pre-university/  
28 junior college, diploma and university), employment status (employed, unemployed and economically  
29 inactive) and household income was collected.  
30  
31  
32  
33  
34  
35

36 **Psychiatric Disorders:** The World Health Organisation World Mental Health Composite  
37 International Diagnostic Interview (WHO WMH-CIDI) is a structured instrument used to generate  
38 diagnoses of DSM-IV disorders using established algorithms with organic exclusion criteria and  
39 hierarchical rules. Modules on Depression, Mania, Generalised Anxiety Disorder, Obsessive  
40 Compulsive Disorder, and Alcohol Use were included in the survey.  
41  
42  
43  
44  
45  
46

47 **Smoking and Nicotine Dependence:** Information on smoking was collected through a question that  
48 asked participants whether they were current smokers, ex-smokers, or non-smokers who never  
49 smoked before. The 6-item Fagerstrom Test for Nicotine Dependence was used to assess physical  
50 dependence on tobacco smoking. Scores of 4 or less are classified as low dependence whilst scores of  
51 8 to 10, as very high dependence. We categorised those with scores 5 and above as dependence as  
52 defined by previous studies [15], including our previous study [13] to ensure consistency for  
53 comparison.  
54  
55  
56  
57  
58  
59  
60



1  
2  
3 **Chronic Medical Conditions:** Respondents were asked to report whether “a doctor ever told you that  
4 you have any of the following...”. This was followed by a list of 18 chronic medical conditions which  
5 are prevalent in Singapore in the form of a checklist. These disorders were reclassified into the  
6 following 9 types of physical disorders: hypertension, hyperlipidemia, diabetes, asthma, chronic pain,  
7 cardiovascular diseases, ulcers, thyroid problems, and cancer.  
8  
9  
10  
11  
12

### 13 14 Statistical analysis

15  
16  
17 All estimates were weighted to adjust for over-sampling and post-stratified for age and ethnicity  
18 distributions between the survey sample and the Singapore resident population. Mean and standard  
19 deviations were calculated for continuous variables, and frequencies and percentages for categorical  
20 variables. The socio-demographic characteristics were compared among the groups and tested for  
21 significant differences using Chi-square tests. This was followed by multiple logistic regression and  
22 multinomial logistic regression analyses to explore the sociodemographic correlates of nicotine  
23 dependence, and current or ex-smoking status. Statistical significance was evaluated at the <0.05 level  
24 using two-sided tests. All statistical analyses were carried out using the Statistical Analysis Software  
25 (SAS) System version 9 (SAS Institute Inc, 2011).  
26  
27  
28  
29  
30  
31  
32  
33  
34  
35

### 36 Patient and Public involvement

37  
38 This research was done without patient involvement. Patients were not invited to comment on the study  
39 design and were not consulted to develop patient relevant outcomes or interpret the results. Patients  
40 were not invited to contribute to the writing or editing of this document for readability or accuracy.  
41  
42  
43  
44

### 45 Results

#### 46 Prevalence of smoking and nicotine dependence

47  
48  
49 Table 1 shows the socio-demographic characteristics of the sample. Table 2 summarises the  
50 prevalence rates in 2010 and 2016. Among the population, 16.1% were current smokers, 10.5% were  
51 ex-smokers, while 3.3% had nicotine dependence. The prevalence of smokers among males was  
52 27.1% and among females it was 5.3%.  
53  
54  
55  
56  
57  
58

#### 59 Sociodemographic correlates of nicotine dependence

1  
2  
3 Table 3 shows the sociodemographic correlates of current smokers and ex-smokers. As  
4 compared to non-smokers, those who were current smokers were more likely to be of Malay, Indian  
5 or Other ethnicity (versus Chinese), male, divorced/separated (compared to married), have lower  
6 education level (i.e. primary or secondary education) or vocational qualifications (i.e. Polytechnic, or  
7 Technical Education) (compared to university degree). Those in the older age groups ( $\geq 50$  years  
8 compared to 18-34years), economically inactive (compared to employed) and with a monthly  
9 household income of more than SGD10, 000 (compared to a monthly household income of SGD  
10 2000) were less likely to be a current smoker. Compared to non-smokers, ex-smokers, similarly, were  
11 of Malay or other ethnicity, males, divorced/separated and had lower/vocational education level.  
12  
13  
14  
15  
16  
17  
18  
19  
20  
21  
22

23 Multiple logistic regression showed (Table 4) that males had 7 times higher risk of nicotine  
24 dependence than females. Furthermore, nicotine dependence was significantly higher in those with  
25 lower or vocational educational qualifications (compared to university education). Older age ( $\geq 50$   
26 years, compared to 18-34years), being economically inactive (compared to employed) and monthly  
27 household income of SGD 4000-5999 (compared to less than SGD2000) was associated with lower  
28 risk of nicotine dependence.  
29  
30  
31  
32  
33  
34  
35

### 36 Relationship between Nicotine Dependence and Psychiatric and Physical Disorders

37  
38  
39 Those with nicotine dependence were significantly more likely to have major depressive  
40 disorder (14.8% vs 6.0%,  $p < .0001$ ), bipolar disorder (5.2% vs 1.4%  $p = 0.003$ ), alcohol abuse (25.8%  
41 vs 3%,  $p < .0001$ ) and alcohol dependence (3.0% vs .05%,  $p < .0001$ ) (Table 5).  
42  
43  
44  
45

46 No associations were found between nicotine dependence and any of the chronic conditions.  
47  
48

## 49 Discussion

50  
51 The prevalence of smoking in the general population remained at 16% from our 2010 national  
52 survey [13]. Prevalence rates in males and females likewise, remained at about 27% in males and  
53 about 5% in females indicating a plateau in smoking prevalence. The sharpest decline occurred  
54 between the 1980s and the 2000s [16] with local rates hovering around 15% in the past 10 years [13].  
55  
56  
57  
58  
59  
60 However, a desirable shift in nicotine dependence from 4.5% in 2010 to 3.3% in 2016 was observed.

1  
2  
3 With one of the lowest smoking prevalence rates in the world, Singapore's challenge is to go beyond  
4 these rates to achieve the target set at 12% by 2020 [12]. Novel endgame solutions such as prohibiting  
5 the sales of tobacco to citizens born after year 2000 and using plain packaging have been proposed  
6 [17].  
7  
8  
9  
10

11  
12 It was noteworthy that as many as 1 in 4 adult males are current smokers accounting for the  
13 vast majority of smokers in the country, with males being 7 times more likely than females to be  
14 nicotine-dependent. More recently, Subramaniam et al. (2015) through focus group discussions with  
15 Singaporean youths identified multiple personal (e.g. coping), social (e.g. for networking) and familial  
16 influences (e.g. early exposure) on young adults' smoking behaviours which provide actionable  
17 information for further anti-smoking initiatives. Factors such as traditional values, normative gender  
18 expectations, and economic independence have been purported for the wide margin of difference  
19 between the sexes [19].  
20  
21  
22  
23  
24  
25  
26  
27  
28  
29

30 Not surprisingly, smoking and nicotine dependence groups were overrepresented in those  
31 with lower or vocational qualifications and less likely to be associated with higher income. Marques-  
32 Vidal et al. (2011) suggested that those with higher levels of education are more responsive to social  
33 initiatives to cut down smoking and anti-smoking messages or have more contact with exemplary role  
34 models. Despite the rising cigarette prices/taxes with the average cost of a pack of 20 cigarettes priced  
35 at US\$9.66 (SGD\$13.31; [21], higher levels of smoking and nicotine dependence were observed  
36 among those with the lowest income levels suggesting alternative strategies are needed to reduce  
37 morbidity and mortality due to smoking for this group.  
38  
39  
40  
41  
42  
43  
44  
45  
46

47 Two other sociodemographic factors that were associated with current smoking prevalence  
48 were ethnic minority (Malay and other ethnicity) and divorced marital status. Almost all Malays in  
49 Singapore are Muslims. While drinking alcohol is clearly forbidden in Islam, smoking is deemed by  
50 many Muslims as acceptable. Ethnic differences may also represent residual confounding by socio-  
51 economic influences that have not been adequately controlled using our proxy measures. Being  
52 married is associated with increased probability of smoking cessation in several studies due to spousal  
53 pressure and support to reduce smoking [22] Other studies found that incompatible health behaviour  
54  
55  
56  
57  
58  
59  
60

1  
2  
3 predict divorce [23]. The health mismatch hypothesis asserts that spousal similarity in health and  
4 lifestyle factors may be related to everyday interaction, support, and the amount of time spouses spend  
5 together. Thus, concordant couples are likely to meet these health challenges with better adaptive  
6 processes than discordant couples. Additionally, the strains of marital discord have also been  
7 associated with negative health behaviours [24].  
8  
9  
10  
11  
12

13  
14 It was also noteworthy that the trend of smokers being in the youngest age group was not seen  
15 in this 2016 dataset which contrasts with our SMHS 2010 study that found smoking to be highest  
16 among those in the 18-34 age group compared to older age groups. This could be due to combined  
17 efforts of raising the minimum age for smoking, increasing cigarette prices and smoking prevention  
18 and cessation programmes in institutes of higher learning in the recent years. Shahwan et al. (2016)  
19 through focus group discussions with youths, identified various elements that were deemed to be  
20 efficacious in anti-smoking campaigns (e.g. positive tone, low-fear visual images, low 'controlling'  
21 language) which may be translated into continued efforts towards further reducing smoking rates in  
22 youths.  
23  
24  
25  
26  
27  
28  
29  
30  
31  
32

33  
34 The relationship between being economically inactive and smoking is less clear. While  
35 unemployment is defined as being out of work and actively seeking work, economic inactivity exists  
36 when a person is without any form of employment and is not actively seeking work. The majority of  
37 individuals in the economic inactivity group consist of housewives, retirees and students. As such, we  
38 speculate that there were several protective factors against smoking for this group such as, higher  
39 education, spousal support, increasing health concerns with advancing age and the desire to improve  
40 longevity and quality of life.  
41  
42  
43  
44  
45  
46  
47

48  
49 Nicotine dependence was significantly associated with alcohol abuse as well as alcohol  
50 dependence. Nicotine-dependent individuals were 26 times more likely to abuse alcohol and about 3  
51 times more likely to be dependent on alcohol than those who were non-nicotine dependent.  
52  
53 Psychosocial factors such risk-prone personality traits, greater opportunities and inclinations to drink,  
54 have been widely accepted as reasons for the well-documented link between smoking and alcoholism  
55 [26]. However, these psychosocial factors may not completely account for the association between  
56  
57  
58  
59  
60

1  
2  
3 smoking and alcohol problems. Some authors have speculated that the progression from the use of  
4 alcohol and tobacco to abuse may be facilitated by effects of early-stage use on central reward  
5 circuitry [27].  
6  
7  
8  
9

10 An association between nicotine dependence and major depressive disorder (MDD) and  
11 bipolar disorder, which was not apparent in 2010, emerged in the current study. The proportion of  
12 individuals with nicotine dependence who had MDD and bipolar disorder increased from 7% to 14%  
13 and 1% to 5% respectively. The prevalence of nicotine dependence in patients with mood disorders  
14 has been reported to range from 50-70% compared to 25% in the general population in other studies  
15 [28]. The comorbidity between nicotine dependence and mood disorders may be explained in at least  
16 two ways. First, various studies have demonstrated shared genetic and environmental influences.  
17 Second, it could also be argued that (i) depression increases the risks of smoking (i.e. through self-  
18 medication) or (ii) smoking increases the risk of depression [29]. Given that the proportion of MDD  
19 and bipolar disorder among individuals with nicotine dependence increased from 2010 to 2016,  
20 further exploration of this relationship is warranted.  
21  
22  
23  
24  
25  
26  
27  
28  
29  
30  
31  
32  
33

34 Current population-level tobacco control interventions may be less effective for those with  
35 mental illness. Health promotion campaigns and smoking policies that use stigma (e.g. the peril that  
36 smokers bring to the rest of the population) as the main motivating factor for giving up smoking may  
37 contribute to social isolation among those with psychiatric disorders [30]. Thus, these efforts are more  
38 likely to perpetuate smoking inequalities than remove them. Cook et al. (2014) found that individuals  
39 receiving mental health treatment are not only less likely to smoke but are more likely to quit,  
40 suggesting that the mental health facility is a promising setting to promote smoking cessation in this  
41 group.  
42  
43  
44  
45  
46  
47  
48  
49  
50

51 Despite cigarette smoking being recognised as a major risk factor of non-communicable  
52 diseases such as cardiovascular disease, cancer, and chronic lung disease, no significant associations  
53 with the chronic medical illnesses assessed in this study were found. We suspected that that  
54 individuals who had developed physical illness would have quit smoking to manage their illness and  
55 improve their prognosis. We conducted a post-hoc logistic regression analysis to examine this and  
56  
57  
58  
59  
60

1  
2  
3 found that ex-smokers were more likely to be diagnosed with diabetes ( $p=.038$ ) and cardiovascular  
4 disease ( $p<.001$ ) after controlling for age and gender. Individuals receiving medical care for these  
5 conditions are likely to be advised by their physicians on the harms of smoking and receive smoking  
6 cessation interventions, which contributes to successful quitting. Another possible reason for the lack  
7 of association between current smoking and physical illness could be due to under-diagnosis.  
8  
9

10  
11  
12  
13 Miravittles et al. (2009) found a large discrepancy when comparing self-report chronic obstructive  
14 pulmonary disease (COPD) and spirometry defined COPD (only 27% of cases identified reported  
15 previous diagnosis). They observed that even though undiagnosed patients had a milder airflow  
16 obstruction, they had significant impairment in health-related quality of life (HRQL) and reduced  
17 levels of activities of daily living (ADL). Both HRQL and ADL are not only markers of “well-being”  
18 but also important predictors of survival in patients with COPD [33]. Local community health  
19 screenings can include spirometry tests and offer simple smoking cessation behavioural support to all  
20 smokers.  
21  
22  
23  
24  
25  
26  
27  
28  
29

30  
31 The study had several limitations. We did not assess other forms of smoking such as use of e-  
32 cigarettes which is gaining popularity despite its ban in Singapore. Secondly, we relied on self-report  
33 which could lead to an underestimation of true prevalence of nicotine dependence and associations  
34 with mental and medical conditions. Third, as this was a cross-sectional study, we are unable to  
35 determine causality. Fourth, although we achieved a fair response rate of 69.5%, there were  
36 sociodemographic differences between respondent and non-respondent groups. Respondents were  
37 more likely to be in the younger age group (i.e. 18-35 years compared to 35-49 years;  $OR=0.65$ ,  
38  $p<.0001$ ; 50-64 years;  $OR=0.68$ ,  $p<.0001$ ; 65+years;  $OR=0.82$ ,  $p=0.005$ ) and of Malay or Indian  
39 ethnicity (compared to Chinese;  $OR=1.87$ ,  $p<.0001$  and  $OR=1.91$ ,  $p<.0001$  respectively). In order to  
40 minimise the impact of this bias, non-response weighting was used to statistically adjust for these  
41 differences. The strengths of this study include the large sample size, the use of structured, well-  
42 validated instruments, and a methodology similar to the 2010 study that allows for a direct  
43 comparison between these two time-points.  
44  
45  
46  
47  
48  
49  
50  
51  
52  
53  
54  
55  
56  
57  
58  
59  
60

1  
2  
3 **Ethics approval.** The study was approved by the National Healthcare Group Domain Specific  
4  
5 Review Board.  
6  
7

8 **Funding.** The study was funded by the Ministry of Health Singapore and Temasek Foundation  
9  
10 Innovates.  
11  
12

13 **Conflict of interest.** The authors have no conflict of interest to declare.  
14  
15

16 **Contributors.** CSA, MS and JV was involved in the planning of the study and provided advice and  
17  
18 guidance throughout the conduct study, and manuscript writing. SZS, SLS, SC, RS, ZYJ were  
19  
20 involved in the conduct of the study. EA conducted the statistical analyses. TYY provided expert  
21  
22 opinion. All authors reviewed the final document.  
23  
24

25 **Acknowledgements.** We would like to thank the interviewers who collected the data of the study.  
26  
27

28 **Data sharing statement.** No additional data available.  
29  
30  
31  
32  
33  
34  
35  
36  
37  
38  
39  
40  
41  
42  
43  
44  
45  
46  
47  
48  
49  
50  
51  
52  
53  
54  
55  
56  
57  
58  
59  
60

## References

- 1 Méndez D, Alshaqeety O, Warner KE. The potential impact of smoking control policies on future global smoking trends. *Tob Control* 2013;**22**:46–51. doi:10.1136/tobaccocontrol-2011-050147
- 2 WHO | Parties to the WHO Framework Convention on Tobacco Control. *WHO* Published Online First: 2017. [https://www.who.int/fctc/signatories\\_parties/en/](https://www.who.int/fctc/signatories_parties/en/) (accessed 7 Mar 2019).
- 3 Mathers CD, Loncar D. Projections of Global Mortality and Burden of Disease from 2002 to 2030. *PLoS Med* 2006;**3**:e442. doi:10.1371/journal.pmed.0030442
- 4 Ng M, Freeman MK, Fleming TD, *et al.* Smoking Prevalence and Cigarette Consumption in 187 Countries, 1980-2012. *JAMA* 2014;**311**:183. doi:10.1001/jama.2013.284692
- 5 Bilano V, Gilmour S, Moffiet T, *et al.* Global trends and projections for tobacco use, 1990-2025: an analysis of smoking indicators from the WHO Comprehensive Information Systems for Tobacco Control. *Lancet (London, England)* 2015;**385**:966–76. doi:10.1016/S0140-6736(15)60264-1
- 6 Hill S, Amos A, Clifford D, *et al.* Impact of tobacco control interventions on socioeconomic inequalities in smoking: review of the evidence. *Tob Control* 2014;**23**:e89-97. doi:10.1136/tobaccocontrol-2013-051110
- 7 Strand BH, Tverdal A. Can cardiovascular risk factors and lifestyle explain the educational inequalities in mortality from ischaemic heart disease and from other heart diseases? 26 year follow up of 50 000 Norwegian men and women. *J Epidemiol Community Heal* 2004;**58**:705–9. doi:10.1136/jech.2003.014563
- 8 Stringhini S, Sabia S, Shipley M, *et al.* Association of Socioeconomic Position With Health Behaviors and Mortality. *JAMA* 2010;**303**:1159. doi:10.1001/jama.2010.297
- 9 Lasser K, Boyd JW, Woolhandler S, *et al.* Smoking and mental illness: A population-based prevalence study. *JAMA* 2000;**284**:2606–10. <http://www.ncbi.nlm.nih.gov/pubmed/11086367>



- (accessed 7 Mar 2019).
- 10 Champion J, Checinski K, Nurse J, *et al*. Smoking by people with mental illness and benefits of  
11 smoke-free mental health services. *Adv Psychiatr Treat* 2008;**14**:217–28.  
12 doi:10.1192/apt.bp.108.005710
- 11 Kessler RC, Chiu WT, Demler O, *et al*. Prevalence, Severity, and Comorbidity of 12-Month  
12 DSM-IV Disorders in the National Comorbidity Survey Replication. *Arch Gen Psychiatry*  
13 2005;**62**:617. doi:10.1001/archpsyc.62.6.617
- 12 Amul GGH, Pang TP. Progress in Tobacco Control in Singapore: Lessons and Challenges in  
13 the Implementation of the Framework Convention on Tobacco Control. *Asia Pacific Policy*  
14 *Stud* 2018;**5**:102–21. doi:10.1002/app5.222
- 13 Picco L, Subramaniam M, Abdin E, *et al*. Smoking and nicotine dependence in Singapore:  
14 findings from a cross-sectional epidemiological study. *Ann Acad Med Singapore* 2012;**41**:325–  
15 34.<http://www.ncbi.nlm.nih.gov/pubmed/23010809> (accessed 7 Mar 2019).
- 14 Health Promotion Board. Health Promotion Board Unveils Two-Pronged Strategy to Step Up  
15 Tobacco Control Efforts on World No Tobacco Day. 2014;:1–  
16 4.[https://www.hpb.gov.sg/article/health-promotion-board-unveils-two-pronged-strategy-to-](https://www.hpb.gov.sg/article/health-promotion-board-unveils-two-pronged-strategy-to-step-up-tobacco-control-efforts-on-world-no-tobacco-day)  
17 [step-up-tobacco-control-efforts-on-world-no-tobacco-day](https://www.hpb.gov.sg/article/health-promotion-board-unveils-two-pronged-strategy-to-step-up-tobacco-control-efforts-on-world-no-tobacco-day)
- 15 Manimunda SP, Benegal V, Sugunan AP, *et al*. Tobacco use and nicotine dependency in a  
16 cross-sectional representative sample of 18,018 individuals in Andaman and Nicobar Islands,  
17 India. *BMC Public Health* 2012;**12**:515. doi:10.1186/1471-2458-12-515
- 16 Lim SS, Vos T, Flaxman AD, *et al*. A comparative risk assessment of burden of disease and  
17 injury attributable to 67 risk factors and risk factor clusters in 21 regions, 1990-2010: a  
18 systematic analysis for the Global Burden of Disease Study 2010. *Lancet (London, England)*  
19 2012;**380**:2224–60. doi:10.1016/S0140-6736(12)61766-8
- 17 Chia KS. TODAYonline | Singapore should aim to be smoke-free, not just smoke-lite.

- 1  
2  
3 TODAYonline. 2017.[https://www.todayonline.com/commentary/singapore-should-aim-be-](https://www.todayonline.com/commentary/singapore-should-aim-be-smoke-free-not-just-smoke-lite)  
4 smoke-free-not-just-smoke-lite (accessed 7 Mar 2019).  
5  
6  
7  
8 18 Subramaniam M, Shahwan S, Fauziana R, *et al.* Perspectives on Smoking Initiation and  
9 Maintenance: A Qualitative Exploration among Singapore Youth. *Int J Environ Res Public*  
10 *Health* 2015;**12**:8956–70. doi:10.3390/ijerph120808956  
11  
12  
13  
14  
15 19 Pierce JP, White VM, Emery SL. What public health strategies are needed to reduce smoking  
16 initiation? *Tob Control* 2012;**21**:258–64. doi:10.1136/tobaccocontrol-2011-050359  
17  
18  
19  
20 20 Marques-Vidal P, Cerveira J, Paccaud F, *et al.* Smoking trends in Switzerland, 1992–2007: a  
21 time for optimism? *J Epidemiol Community Heal* 2011;**65**:281–6.  
22 doi:10.1136/JECH.2009.099424  
23  
24  
25  
26  
27 21 Lim J-L. How Much Does Smoking Cost in Singapore?  
28 2018.<https://www.imoney.sg/articles/smoking-cost-singapore/> (accessed 8 Mar 2019).  
29  
30  
31  
32 22 Broms U, Silventoinen K, Lahelma E, *et al.* Smoking cessation by socioeconomic status and  
33 marital status: The contribution of smoking behavior and family background. *Nicotine Tob Res*  
34 2004;**6**:447–55. doi:10.1080/14622200410001696637  
35  
36  
37  
38  
39 23 Torvik FA, Gustavson K, Røysamb E, *et al.* Health, health behaviors, and health dissimilarities  
40 predict divorce: results from the HUNT study. *BMC Psychol* 2015;**3**:13. doi:10.1186/s40359-  
41 015-0072-5  
42  
43  
44  
45  
46 24 Umberson D, Williams K, Powers DA, *et al.* You make me sick: marital quality and health  
47 over the life course. *J Health Soc Behav* 2006;**47**:1–16. doi:10.1177/002214650604700101  
48  
49  
50  
51 25 Shahwan S, Fauziana R, Satghare P, *et al.* Qualitative study of Singaporean youths' perception  
52 of antismoking campaigns: what works and what does not. *Tob Control* 2016;**25**:e101–6.  
53 doi:10.1136/tobaccocontrol-2015-052692  
54  
55  
56  
57 26 Dinn WM, Aycicegi A, Harris CL. Cigarette smoking in a student sample: neurocognitive and  
58 clinical correlates. *Addict Behav* 2004;**29**:107–  
59  
60

- 1  
2  
3 26.<http://www.ncbi.nlm.nih.gov/pubmed/14667424> (accessed 8 Mar 2019).  
4  
5  
6 27 Doyon WM, Dong Y, Ostroumov A, *et al*. Nicotine Decreases Ethanol-Induced Dopamine  
7 Signaling and Increases Self-Administration via Stress Hormones. *Neuron* 2013;**79**:530–40.  
8 doi:10.1016/j.neuron.2013.06.006  
9  
10  
11  
12  
13 28 Glassman AH, Helzer JE, Covey LS, *et al*. Smoking, smoking cessation, and major depression.  
14 *JAMA* 1990;**264**:1546–9.<http://www.ncbi.nlm.nih.gov/pubmed/2395194> (accessed 8 Mar  
15 2019).  
16  
17  
18  
19  
20 29 Munafò MR, Hitsman B, Rende R, *et al*. Effects of progression to cigarette smoking on  
21 depressed mood in adolescents: evidence from the National Longitudinal Study of Adolescent  
22 Health. *Addiction* 2008;**103**:162–71. doi:10.1111/j.1360-0443.2007.02052.x  
23  
24  
25  
26  
27 30 Farrimond HR, Joffe H. Pollution, peril and poverty: a British study of the stigmatization of  
28 smokers. *J Community Appl Soc Psychol* 2006;**16**:481–91. doi:10.1002/casp.896  
29  
30  
31  
32 31 Cook BL, Wayne GF, Kafali EN, *et al*. Trends in Smoking Among Adults With Mental Illness  
33 and Association Between Mental Health Treatment and Smoking Cessation. *JAMA*  
34 2014;**311**:172. doi:10.1001/jama.2013.284985  
35  
36  
37  
38  
39 32 Miravittles M, Soriano JB, Garcia-Rio F, *et al*. Prevalence of COPD in Spain: impact of  
40 undiagnosed COPD on quality of life and daily life activities. *Thorax* 2009;**64**:863–8.  
41 doi:10.1136/thx.2009.115725  
42  
43  
44  
45  
46 33 Domingo-Salvany A, Lamarca R, Ferrer M, *et al*. Health-related Quality of Life and Mortality  
47 in Male Patients with Chronic Obstructive Pulmonary Disease. *Am J Respir Crit Care Med*  
48 2002;**166**:680–5. doi:10.1164/rccm.2112043  
49  
50  
51  
52  
53  
54  
55  
56  
57  
58  
59  
60

## Tables

**Table 1. Socio-demographic distribution of the sample (N = 6,126)**

| Sociodemographic characteristics | N    | Unweighted | Weighted |
|----------------------------------|------|------------|----------|
|                                  |      | %          | %        |
| <b>Age Group (years)</b>         |      |            |          |
| 18-34                            | 1707 | 27.9       | 30.4     |
| <b>(Mean = 45.2)</b>             |      |            |          |
| 35-49                            | 1496 | 24.4       | 29.6     |
| 50-64                            | 1626 | 26.5       | 26.9     |
| 65+                              | 1297 | 21.2       | 13.1     |
| <b>Gender</b>                    |      |            |          |
| Female                           | 3058 | 49.9       | 50.4     |
| Male                             | 3068 | 50.1       | 49.6     |
| <b>Ethnicity</b>                 |      |            |          |
| Chinese                          | 1782 | 29.1       | 75.7     |
| Malay                            | 1990 | 32.5       | 12.5     |
| Indian                           | 1844 | 30.1       | 8.7      |
| Others                           | 510  | 8.3        | 3.1      |
| <b>Marital Status</b>            |      |            |          |
| Never Married                    | 1544 | 25.2       | 31.0     |
| Married                          | 3843 | 62.7       | 59.8     |
| Divorced / Separated             | 343  | 5.6        | 5.2      |
| Widowed                          | 396  | 6.5        | 4.1      |
| <b>Education</b>                 |      |            |          |
| Primary and below                | 1187 | 19.4       | 16.3     |
| Secondary                        | 1648 | 26.9       | 23.0     |

|                                      |                        |      |      |      |
|--------------------------------------|------------------------|------|------|------|
|                                      | Pre-U/Junior College   | 304  | 5.0  | 6.0  |
|                                      | Vocational/ITE         | 508  | 8.3  | 6.3  |
|                                      | Diploma                | 1024 | 16.7 | 19.0 |
|                                      | University             | 1455 | 23.8 | 29.4 |
| <b>Employment</b>                    | Employed               | 4055 | 66.2 | 72.0 |
|                                      | Economically inactive* | 1716 | 28.0 | 22.7 |
|                                      | Unemployed             | 354  | 5.8  | 5.3  |
| <b>Household Income (SGD/ month)</b> | Below 2000             | 1147 | 21.0 | 16.5 |
|                                      | 2,000 – 3,999          | 1331 | 24.4 | 20.0 |
|                                      | 4,000 – 5,999          | 1113 | 20.4 | 21.4 |
|                                      | 6,000 – 9,999          | 1003 | 18.4 | 21.8 |
|                                      | 10,000 & above         | 861  | 15.8 | 20.3 |

\* Includes homemakers, students and retirees / pensioners; SGD- Singapore Dollars

Table 2. Prevalence of smoking and nicotine dependence

|                     | 2010 | 2016 | p value |
|---------------------|------|------|---------|
| Current smokers     | 16.0 | 16.1 | n.s.    |
| Ex-smokers          | 10.8 | 10.5 | n.s.    |
| Nicotine dependence | 4.5  | 3.3  | 0.007   |
| Gender              |      |      |         |
| Male                | 27.0 | 27.1 | n.s.    |
| Females             | 5.6  | 5.3  | n.s.    |

Table 3. Sociodemographic correlates of current smoking and ex-smokers

|            |                       | Current smoker vs Non-smoker |                    |                  | Ex-smoker versus Non-smoker |                   |                  |
|------------|-----------------------|------------------------------|--------------------|------------------|-----------------------------|-------------------|------------------|
|            |                       | OR                           | 95% CI             | p value          | OR                          | 95% CI            | p value          |
| Age group  | 18-34                 | Ref                          |                    |                  | Ref                         |                   |                  |
|            | 35-49                 | 0.9                          | (.6, 1.3)          | 0.48             | 1.1                         | (.7, 1.6)         | 0.84             |
|            | 50-64                 | <b>0.4</b>                   | <b>(.2, .6)</b>    | <b>&lt;.0001</b> | 0.7                         | (.5, 1.2)         | 0.18             |
|            | 65 and above          | <b>0.2</b>                   | <b>(.1, .4)</b>    | <b>&lt;.0001</b> | 0.8                         | (.5, 1.4)         | 0.43             |
| Ethnicity  | Chinese               | Ref                          |                    |                  | Ref                         |                   |                  |
|            | Malay                 | <b>2.4</b>                   | <b>(1.9, 3.0)</b>  | <b>&lt;.0001</b> | <b>1.9</b>                  | <b>(1.5, 2.5)</b> | <b>&lt;.0001</b> |
|            | Indian                | <b>1.4</b>                   | <b>(1.1, 1.8)</b>  | <b>0.004</b>     | 1.1                         | (.9, 1.5)         | 0.32             |
|            | Others                | <b>1.7</b>                   | <b>(1.2, 2.6)</b>  | <b>0.008</b>     | <b>2.0</b>                  | <b>(1.3, 2.8)</b> | <b>0.001</b>     |
| Sex        | Male                  | <b>8.8</b>                   | <b>(6.5, 11.8)</b> | <b>&lt;.0001</b> | <b>5.5</b>                  | <b>(4.0, 7.5)</b> | <b>&lt;.0001</b> |
|            | Female                | Ref                          |                    |                  | Ref                         |                   |                  |
| Marital    | Single                | Ref                          |                    |                  | Ref                         |                   |                  |
|            | Married               | 0.9                          | (.6, 1.2)          | 0.42             | 1.3                         | (.8, 2.0)         | 0.27             |
|            | Divorced/Separated    | <b>1.9</b>                   | <b>(1.1, 3.5)</b>  | <b>0.04</b>      | <b>2.5</b>                  | <b>(1.3, 4.8)</b> | <b>0.008</b>     |
|            | Widowed               | 0.8                          | (.3, 1.8)          | 0.57             | 0.7                         | (.3, 1.8)         | 0.52             |
| Education  | Primary               | <b>13.8</b>                  | <b>(7.9, 24.1)</b> | <b>&lt;.0001</b> | 3.8                         | <b>(2.3, 6.3)</b> | <b>&lt;.0001</b> |
|            | Secondary             | <b>7.3</b>                   | <b>(4.5, 12.0)</b> | <b>&lt;.0001</b> | 2.6                         | <b>(1.7, 4.1)</b> | <b>&lt;.0001</b> |
|            | Pre-U/JC/Diploma      | 1.7                          | (.8, 3.8)          | 0.185            | 1.5                         | (.7, 3.0)         | 0.26             |
|            | Vocational/ITE        | <b>7.8</b>                   | <b>(4.7, 13.0)</b> | <b>&lt;.0001</b> | <b>3.1</b>                  | <b>(1.8, 5.3)</b> | <b>&lt;.0001</b> |
|            | Diploma               | <b>3.1</b>                   | <b>(2.0, 4.8)</b>  | <b>&lt;.0001</b> | 1.8                         | <b>(1.2, 2.8)</b> | <b>0.008</b>     |
|            | University            | Ref                          |                    |                  | Ref                         |                   |                  |
| Employment | Employed              | Ref                          |                    |                  | Ref                         |                   |                  |
|            | Economically inactive | <b>0.3</b>                   | <b>(.2, .5)</b>    | <b>&lt;.0001</b> | 0.9                         | (.6, 1.3)         | 0.46             |
|            | Unemployed            | 0.9                          | (.5, 1.5)          | 0.65             | 0.9                         | (.5, 1.6)         | 0.8              |
| Household  | <SGD 2000             | Ref                          |                    |                  | Ref                         |                   |                  |
| Income     | SGD 2000-3999         | 0.8                          | (.6, 1.2)          | 0.23             | 0.7                         | (.5, 1.1)         | 0.1              |
|            | SGD 4000-5999         | 0.8                          | (.5, 1.1)          | 0.16             | 0.8                         | (.5, 1.3)         | 0.43             |

|                    |            |                  |             |     |           |      |
|--------------------|------------|------------------|-------------|-----|-----------|------|
| SGD 6000-9999      | 0.9        | (.6, 1.3)        | 0.45        | 0.9 | (.5, 1.4) | 0.54 |
| <b>≥SGD 10 000</b> | <b>0.6</b> | <b>(.3, 1.0)</b> | <b>0.04</b> | 1.0 | (.6, 1.6) | 0.88 |

Table 4. Sociodemographic correlates of Nicotine Dependence

|            |                              | OR          | 95% CI              | P value          |
|------------|------------------------------|-------------|---------------------|------------------|
| Age group  | 18-34                        | Ref         |                     |                  |
|            | 35-49                        | 0.6         | (.3, 1.1)           | 0.34             |
|            | 50-64                        | <b>0.3</b>  | <b>(.2, .6)</b>     | <b>0.001</b>     |
|            | 65 and above                 | <b>0.3</b>  | <b>(.1, .7)</b>     | <b>0.007</b>     |
| Ethnicity  | Chinese                      | Ref         |                     |                  |
|            | Malay                        | 1.5         | (.9, 2.3)           | 0.1              |
|            | Indian                       | 1.3         | (.8, 2.0)           | 0.31             |
|            | Others                       | 1.4         | (.6, 3.2)           | 0.41             |
| Sex        | Male                         | <b>6.9</b>  | <b>(3.6, 13.2)</b>  | <b>&lt;.0001</b> |
|            | Female                       | Ref         |                     |                  |
| Marital    | Single                       | Ref         |                     |                  |
|            | Married                      | 0.8         | (.5, 1.5)           | 0.5              |
|            | Divorced/Separated           | 0.8         | (.3, 1.8)           | 0.57             |
|            | Widowed                      | 1.7         | (.4, 6.7)           | 0.43             |
|            |                              |             |                     |                  |
| Education  | <b>Primary</b>               | <b>37.0</b> | <b>(8.3, 165.1)</b> | <b>&lt;.0001</b> |
|            | <b>Secondary</b>             | <b>23.3</b> | <b>(5.8, 92.6)</b>  | <b>&lt;.0001</b> |
|            | Pre-U/JC/                    | 2.1         | (.4, 9.8)           | 0.359            |
|            | <b>Vocational/ITE</b>        | <b>16.0</b> | <b>(4.0, 63.8)</b>  | <b>&lt;.0001</b> |
|            | <b>Diploma</b>               | <b>10.0</b> | <b>(2.7, 37.0)</b>  | <b>&lt;.0001</b> |
|            | University                   | Ref         |                     |                  |
| Employment | Employed                     | Ref         |                     |                  |
|            | <b>Economically inactive</b> | <b>0.1</b>  | <b>(.1, .3)</b>     | <b>&lt;.0001</b> |

|           |                      |            |                 |              |
|-----------|----------------------|------------|-----------------|--------------|
|           | Unemployed           | 0.6        | (.3, 1.4)       | 0.26         |
| Household |                      |            |                 |              |
| Income    | Below SGD 2000       | Ref        |                 |              |
|           | SGD 2000-3900        | 0.8        | (.5, 1.5)       | 0.56         |
|           | <b>SGD 4000-5999</b> | <b>0.4</b> | <b>(.2, .8)</b> | <b>0.009</b> |
|           | SGD 6000-9999        | 0.6        | (.3, 1.4)       | 0.24         |
|           | 10 000 and above     | 0.6        | (.2, 1.4)       | 0.21         |

Table 5. Prevalence and odds ratio of other lifetime psychiatric disorders in people with nicotine dependence

| Lifetime psychiatric disorders   | %           | SE         | OR         | 95CI               | p value          |
|----------------------------------|-------------|------------|------------|--------------------|------------------|
| <b>Major Depressive Disorder</b> | <b>14.8</b> | <b>0.4</b> | <b>3.0</b> | <b>(1.7, 5.5)</b>  | <b>&lt;.0001</b> |
| Dysthymia                        | 0.1         | 0.0        | 0.4        | (.1, 3.5)          | 0.42             |
| <b>Bipolar Disorder</b>          | <b>5.2</b>  | <b>0.0</b> | <b>3.7</b> | <b>(1.6, 8.8)</b>  | <b>0.003</b>     |
| Generalised Anxiety Disorder     | 1.6         | 0.0        | 1.0        | (.4, 2.2)          | 0.96             |
| Obsessive Compulsive Disorder    | 5.1         | 0.0        | 1.5        | (.6,3.7)           | 0.34             |
| <b>Alcohol Abuse</b>             | <b>25.8</b> | <b>0.0</b> | <b>6.7</b> | <b>(4.0, 11.3)</b> | <b>&lt;0001</b>  |
| <b>Alcohol dependence</b>        | <b>3.0</b>  | <b>0.0</b> | <b>4.0</b> | <b>(1.4,11.5)</b>  | <b>0.009</b>     |

After adjusting for age and gender



# BMJ Open

## Prevalence and correlates of smoking and nicotine dependence: Results of a nationwide cross-sectional survey among Singapore residents

|                                 |                                                                                                                                                                                                                                                                                                                                                                                                                                                                                                                                                                                                                                                                                                                                                                                                   |
|---------------------------------|---------------------------------------------------------------------------------------------------------------------------------------------------------------------------------------------------------------------------------------------------------------------------------------------------------------------------------------------------------------------------------------------------------------------------------------------------------------------------------------------------------------------------------------------------------------------------------------------------------------------------------------------------------------------------------------------------------------------------------------------------------------------------------------------------|
| Journal:                        | <i>BMJ Open</i>                                                                                                                                                                                                                                                                                                                                                                                                                                                                                                                                                                                                                                                                                                                                                                                   |
| Manuscript ID                   | bmjopen-2019-032198.R1                                                                                                                                                                                                                                                                                                                                                                                                                                                                                                                                                                                                                                                                                                                                                                            |
| Article Type:                   | Original research                                                                                                                                                                                                                                                                                                                                                                                                                                                                                                                                                                                                                                                                                                                                                                                 |
| Date Submitted by the Author:   | 23-Aug-2019                                                                                                                                                                                                                                                                                                                                                                                                                                                                                                                                                                                                                                                                                                                                                                                       |
| Complete List of Authors:       | Shahwan, Shazana; Institute of Mental Health, Research Division<br>Abdin , Edimansyah ; Institute of Mental Health, Research Division<br>Shafie, Saleha; Institute of Mental Health, Research Division<br>Chang, Sherilyn; Institute of Mental Health, Research Division<br>Sambasivam, Rajeswari; Institute of Mental Health, Research Division<br>Zhang, Yun-jue; Institute of Mental Health, Research Division<br>Vaingankar, Janhavi; Institute of Mental Health, Research Division<br>Teo, Yik Ying; National University of Singapore, Saw Swee Hock School of Public Health<br>Heng, Derrick; Government of Singapore Ministry of Health, Public Policy<br>Chong, Siow Ann ; Institute of Mental Health, Research Division<br>Subramaniam, M; Institute of Mental Health, Research Division |
| <b>Primary Subject Heading</b>: | Public health                                                                                                                                                                                                                                                                                                                                                                                                                                                                                                                                                                                                                                                                                                                                                                                     |
| Secondary Subject Heading:      | Smoking and tobacco, Mental health                                                                                                                                                                                                                                                                                                                                                                                                                                                                                                                                                                                                                                                                                                                                                                |
| Keywords:                       | Public health < INFECTIOUS DISEASES, Epidemiology < TROPICAL MEDICINE, MENTAL HEALTH                                                                                                                                                                                                                                                                                                                                                                                                                                                                                                                                                                                                                                                                                                              |
|                                 |                                                                                                                                                                                                                                                                                                                                                                                                                                                                                                                                                                                                                                                                                                                                                                                                   |

SCHOLARONE™  
Manuscripts

1  
2  
3 Title: Prevalence and correlates of smoking and nicotine dependence: Results of a nationwide cross-  
4 sectional survey among Singapore residents  
5  
6

7  
8 Shazana Shahwan<sup>1a</sup>, Edimansyah Abdin<sup>1</sup>, Saleha Shafie<sup>1</sup>, Sherilyn Chang<sup>1</sup>, Rajeswari Sambasivam<sup>1</sup>,  
9  
10 Yun Jue Zhang<sup>1</sup>, Janhavi Vaingankar<sup>1</sup>, Yik Ying Teo<sup>2</sup>, Derrick Heng<sup>3</sup>, Siow Ann Chong<sup>1</sup>, Mythily  
11  
12 Subramaniam<sup>1,2</sup>  
13  
14  
15  
16  
17  
18

19 <sup>1</sup>Research Division, Institute of Mental Health, Singapore

20 <sup>2</sup>Saw Swee Hock School of Public Health, National University of Singapore

21 <sup>3</sup>Public Policy, Ministry of Health, Singapore  
22  
23  
24  
25

26 <sup>a</sup>Corresponding author

27  
28 Email address: [shazana\\_mohamed\\_shahwan@imh.com.sg](mailto:shazana_mohamed_shahwan@imh.com.sg)

29  
30 Postal address: Buangkok Green Medical Park, 10 Buangkok View, Singapore 793747

31  
32 Tel: +65 6389 1924

33  
34 Fax: +65 6389 2795  
35  
36  
37  
38  
39  
40

41  
42  
43  
44  
45  
46  
47  
48  
49  
50  
51  
52  
53  
54  
55  
56  
57  
58  
59  
60

Keywords: smoking, nicotine dependence, correlates, prevalence, psychiatric

Word count: 2966 words

Number of references: 36

## Abstract

1  
2  
3  
4  
5  
6 Background: Since the Singapore Mental Health Study in 2010 which reported a 16% prevalence rate  
7  
8 for current smokers and 4.5% for nicotine-dependence, new anti-smoking strategies have been  
9  
10 implemented. The aim of this study was to compare smoking trends from the 2010 study with the  
11  
12 second Singapore Mental Health Study in 2016 (SMHS 2016).  
13

14  
15 Methods: A survey of 6126 individuals aged 18 years and above randomly selected among Singapore  
16  
17 residents was conducted using the same methodology as the 2010 study. The measures used in this  
18  
19 analysis were sociodemographic questions, the Composite International Diagnostic Interview which  
20  
21 assessed for psychiatric disorders, The Fagerstrom Test for Nicotine Dependence, and a list of chronic  
22  
23 physical conditions which are prevalent in Singapore. Logistic regression analyses were used to test  
24  
25 for associations between smoking/nicotine-dependence and other measures.  
26

27  
28 Results: In the SMHS 2016, 16% were current smokers and 3.3% were nicotine-dependent. As  
29  
30 compared to non-smokers, current smokers were more likely to be younger, male, of ethnic minority ,  
31  
32 and had lower/vocational education level. Younger age, male gender, lower/vocational education and  
33  
34 psychiatric disorders (major depression, bipolar disorder and alcohol use disorders) predicted nicotine  
35  
36 dependence. No associations were found between nicotine dependence and any of the chronic  
37  
38 conditions.  
39

40  
41 Conclusion: The prevalence of current smokers in the population has plateaued while that of nicotine  
42  
43 dependence has decreased from 2010. However, the study did not investigate the use of e-cigarettes.  
44  
45 Inequalities in smoking and nicotine dependence continue to pervade the population particularly  
46  
47 among those of ethnic minority, lower/vocational education and the mentally ill.  
48  
49  
50  
51  
52  
53  
54  
55  
56  
57  
58  
59  
60

### Strengths and limitations of this study

- The study reports the prevalence and correlates of smoking and nicotine dependence based on a large representative sample of the Singapore population.
- The same methodology and instruments employed in the 2010 study was applied allowing direct comparisons with the earlier study.
- The study did not include individuals below 18 years of age and did not assess for alternative forms of smoking such as e-cigarettes that are gaining popularity.
- Reliance on self-report could lead to an underestimation of the true prevalence of nicotine dependence and associations with mental and medical conditions

## Prevalence and correlates of smoking and nicotine dependence among Singapore residents

Cigarette smoking is a leading cause of preventable death worldwide [1]. Smoking-related diseases contribute significantly to the global rise in incidence of non-communicable diseases in both developed and developing countries [2]. Smoking ranks high among public health problems in the world, with an estimated 7.4-9.7 million tobacco-attributable deaths by 2030 [3].

In 2003, the World Health Assembly adopted the Framework Convention on Tobacco Control (FCTC) to take steps to reduce both the supply of and demand for tobacco products. This treaty is now ratified by 181 countries[2]. To help those countries fulfil their commitment to the FCTC, the WHO disseminated recommendations consisting of six strategies: monitor tobacco use; protect people from tobacco smoke; offer help to quit tobacco use; warn about the dangers of tobacco; enforce bans on tobacco advertising, promotion and sponsorship; and raise taxes on tobacco. Steady decline in smoking prevalence rates have been seen in countries such as New Zealand [4], Turkey, and Sweden [5] since the implementation of FCTC strategies.

However, these changes have not occurred uniformly across all population groups. An upward trend in smoking debut in early adolescence was found in a European study [6]. Disparities in smoking prevalence in underprivileged populations are also widening. In the United States, for example, less than 20% of those at or above the poverty level smoke compared with 30% of those below the poverty level. Other socioeconomic measures associated with inequalities in smoking include education, income, and neighbourhood deprivation [7]. The higher prevalence of smoking in individuals from lower SES groups is the single most important cause of socioeconomic differences in mortality [8].

Another subpopulation with exceptionally high rates of smoking internationally is individuals with mental illness. Individuals with mental illness smoke at rates approximately twice that of adults without mental disorders [9]. Smoking is believed to account for the majority of excess mortality among individuals with serious mental illness [10]. Life expectancy among people with severe mental illness is 25 years less than that among the general population [11]. Monitoring trends in the

1  
2  
3 population and between subgroups aids countries in taking necessary corrections or new actions for  
4 tobacco control.  
5  
6

7  
8 Singapore is city-state located in the South-east Asia with a multi-ethnic population and was  
9 among the first 40 countries to ratify the FCTC. It exercises stringent smoking policies and extensive  
10 regulations on the demand and supply of tobacco [12]. In the nation-wide Singapore Mental Health  
11 Study conducted in 2010, (SMHS 2010), Picco and colleagues [13] reported local smoking prevalence  
12 rates of 16%. Smokers were more likely to be of younger age, males, Malay ethnicity and have lower  
13 education. Prevalence of nicotine dependence was higher in those with alcohol abuse and those  
14 experiencing chronic pain. Singapore aims to lower smoking prevalence rates to 12 per cent by 2020  
15 through a multipronged strategy composed of preventing initiation among the youth, public education  
16 and specific programs for target groups, and providing more support and access to smoking cessation  
17 programs [14].  
18  
19  
20  
21  
22  
23  
24  
25  
26  
27  
28

29  
30 The purpose of this study was to compare and contrast smoking trends from the 2010 study  
31 with the second Singapore Mental Health Study which began in 2016 (SMHS 2016) [15]. As stricter  
32 anti-smoking laws (e.g. raising minimum smoking age to 21years, expanding smoke-free zones) and  
33 new campaigns were launched after 2010, we hypothesize that there will be a decline in the  
34 prevalence of smoking and nicotine dependence in the SMHS 2016. This study also examined  
35 sociodemographic risk factors of smoking and nicotine dependence as well as the association of  
36 nicotine dependence with lifetime psychiatric and physical disorders.  
37  
38  
39  
40  
41  
42  
43  
44

## 45 Methods

### 46 Participants and Procedure

47  
48 The SMHS 2016 was conducted between 2016 and 2018 following the same procedures as  
49 the SMHS 2010 [16]. This population-based, cross-sectional study included Singapore citizens and  
50 permanent residents aged 18 years and above living in Singapore. The sampling frame was based on a  
51 national population registry of all citizens and permanent residents in Singapore, and is updated  
52 regularly. Individuals were randomly selected using a disproportionate stratified sampling design with  
53  
54  
55  
56  
57  
58  
59  
60

1  
2  
3 16 strata defined according to ethnicity (Chinese, Malay, Indian, Others) and age groups (18-34, 35-  
4 49, 50-64, 65 and above). Residents aged 65 and above, Malays and Indians were over sampled to  
5 ensure that an adequate sample size would be achieved to improve the reliability of estimates for the  
6 subgroup analysis. We requested 15,907 records of Singapore residents. 11,100 records were  
7 eventually released in eight different batches. About 20% of these were ineligible cases (e.g. ineligible  
8 language, incorrect address) which were excluded from the response rate calculation. In all, 6126  
9 respondents were interviewed, giving a response rate of 69.5%. Data on household structure was not  
10 collated and not accounted for in the analysis.

11  
12  
13  
14  
15  
16  
17  
18  
19  
20 An invitation letter was sent to each respondent followed by a personal home visit by a  
21 trained interviewer to obtain his/her agreement to participate in the survey. Trained interviewers from  
22 a survey research company conducted face-to-face interviews with those who agreed to participate in  
23 the study. The questionnaires were available in English, Chinese and Malay. Residents who were  
24 incapable of doing an interview due to severe physical/mental conditions, language barriers; were  
25 living outside the country, institutionalized/hospitalized, and those who were not contactable due to  
26 incomplete/ incorrect address, were excluded from the survey. Consent was obtained from all  
27 participants prior to commencement of any study procedure. Parental consent was also obtained for  
28 minors aged 18-20 years.

### 39 Measures

40  
41  
42 **Sociodemographic information:** Data on gender, age groups (18–34, 35–49, 50–64, and  $\geq 65$  years),  
43 ethnicity (Chinese, Malay, Indian, and Others), marital status (single, married, divorced/ separated or  
44 widowed), educational level (primary and below, secondary, vocational institute, pre-university/  
45 junior college, diploma and university), employment status (employed, unemployed and economically  
46 inactive) and household income was collected.

47  
48  
49  
50  
51  
52  
53 **Psychiatric Disorders:** The World Health Organisation World Mental Health Composite  
54 International Diagnostic Interview (WHO WMH-CIDI) is a structured instrument used to generate  
55 diagnoses of DSM-IV disorders using established algorithms with organic exclusion criteria and  
56  
57  
58  
59  
60

1  
2  
3 hierarchical rules. Modules on Depression, Mania, Generalised Anxiety Disorder, Obsessive  
4 Compulsive Disorder, and Alcohol Use were included in the survey.  
5  
6

7  
8 **Smoking and Nicotine Dependence:** Information on smoking was collected through a question that  
9 asked participants whether they were current smokers, ex-smokers, or non-smokers who never  
10 smoked before. The 6-item Fagerstrom Test for Nicotine Dependence was used to assess physical  
11 dependence on tobacco smoking. Scores of 4 or less are classified as low dependence whilst scores of  
12 8 to 10, as very high dependence. We categorised those with scores 5 and above as dependence as  
13 defined by previous studies [17], including our previous study [13] to ensure consistency for  
14 comparison.  
15  
16  
17  
18  
19  
20  
21  
22

23 **Chronic Medical Conditions:** Respondents were asked to report whether “a doctor ever told you that  
24 you have any of the following...”. This was followed by a list of 18 chronic medical conditions which  
25 are prevalent in Singapore in the form of a checklist. These disorders were reclassified into the  
26 following 9 types of physical disorders: hypertension, hyperlipidemia, diabetes, asthma, chronic pain,  
27 cardiovascular diseases, ulcers, thyroid problems, and cancer.  
28  
29  
30  
31  
32  
33

#### 34 Statistical analysis

35  
36  
37 All estimates were weighted to adjust for over-sampling and post-stratified for age and ethnicity  
38 distributions between the survey sample and the Singapore resident population. Mean and standard  
39 deviations were calculated for continuous variables, and frequencies and percentages for categorical  
40 variables. The socio-demographic characteristics were compared among the groups and tested for  
41 significant differences using Chi-square tests. This was followed by multiple logistic regression and  
42 multinomial logistic regression analyses to explore the sociodemographic correlates of nicotine  
43 dependence, and current or ex-smoking status. Gender-specific analyses were also conducted to  
44 compare the prevalence rates between 2010 and 2016 as well to explore sociodemographic correlates  
45 of nicotine dependence, current and ex-smoking status. Statistical significance was evaluated at the  
46 <0.05 level using two-sided tests. All statistical analyses were carried out using the Statistical Analysis  
47 Software (SAS) System version 9.  
48  
49  
50  
51  
52  
53  
54  
55  
56  
57  
58  
59  
60



## Patient and Public involvement

This research was done without patient involvement. Patients were not invited to comment on the study design and were not consulted to develop patient relevant outcomes or interpret the results. Patients were not invited to contribute to the writing or editing of this document for readability or accuracy.

## Results

### Prevalence of smoking and nicotine dependence

Table 1 shows the socio-demographic characteristics of the sample classified by smoker, ex-smoker and non-smoker status. Table 2 summarises the prevalence rates in 2010 and 2016. Among the population, 16.1% were current smokers, 10.5% were ex-smokers, while 3.3% had nicotine dependence. The prevalence of smokers among males was 27.1% and among females it was 5.3%. Supplementary Table 1 provides further information of the prevalence of current smokers, ex-smokers and nicotine dependence by age group and gender.

### Sociodemographic correlates of nicotine dependence

Table 3 shows the sociodemographic correlates of current smokers and ex-smokers. As compared to non-smokers, those who were current smokers were more likely to be of Malay, Indian or Other ethnicity (versus Chinese), male, divorced/separated (compared to married), have lower education level (i.e. primary or secondary education) or vocational qualifications (i.e. Polytechnic, or Technical Education) (compared to university degree). Those in the older age groups ( $\geq 50$  years compared to 18-34 years), economically inactive (compared to employed) and with a monthly household income of more than SGD10,000 (compared to a monthly household income of SGD 2000) were less likely to be a current smoker. Compared to non-smokers, ex-smokers, similarly, were of Malay or other ethnicity, males, divorced/separated and had lower/vocational education level. Supplementary Tables 2a and 2b present the sociodemographic correlates of male current and ex-smokers and that of females respectively. The results are consistent for both sexes with exception to income, where the highest income group ( $>SGD 10,000$ ) was associated with lower odds of smoking in males whereas the lower income group (SGD 2000-3999) was associated with lower odds of

1  
2  
3 smoking in females. The relationship between marital status and smoking however was inconsistent  
4  
5 with no association found for males and a lower odds of current smoking associated with being  
6  
7 widowed in females (although being divorced/separated was associated with higher odds of being a  
8  
9 current or ex-smoker for the overall sample).  
10

11  
12 Multiple logistic regression showed (Table 4) that males had 7 times higher risk of nicotine  
13  
14 dependence than females. Furthermore, nicotine dependence was significantly higher in those with  
15  
16 lower or vocational educational qualifications (compared to university education). Older age ( $\geq 50$   
17  
18 years, compared to 18-34years), being economically inactive (compared to employed) and monthly  
19  
20 household income of SGD 4000-5999 (compared to less than SGD2000) was associated with lower  
21  
22 risk of nicotine dependence. Supplementary Tables 3a and 3b present the sociodemographic correlates  
23  
24 of nicotine dependence in males and females respectively. The results are for both sexes are consistent  
25  
26 with that of the overall sample.  
27  
28

### 29 Relationship between Nicotine Dependence and Psychiatric and Physical Disorders

30  
31  
32 Those with nicotine dependence were significantly more likely to have major depressive  
33  
34 disorder, bipolar disorder, alcohol abuse and alcohol dependence. Gender difference was observed for  
35  
36 OCD where females with nicotine dependence were 6 times more likely to have OCD than those  
37  
38 without nicotine dependence but this association was not observed in males. These results are  
39  
40 summarised in Table 5.  
41  
42

43  
44 No associations were found between nicotine dependence and any of the chronic conditions.  
45

### 46 Discussion

47  
48  
49 The prevalence of smoking in the general population remained at 16% from our 2010 national  
50  
51 survey [13]. Prevalence rates in males and females likewise, remained at about 27% in males and  
52  
53 about 5% in females indicating a plateau in smoking prevalence. The sharpest decline occurred  
54  
55 between the 1980s and the 2000s [18] with local rates hovering around 15% in the past 10 years [13].  
56  
57 However, a desirable shift in nicotine dependence from 4.5% in 2010 to 3.3% in 2016 was observed.  
58  
59 With one of the lowest smoking prevalence rates in the world, Singapore's challenge is to go beyond  
60

1  
2  
3 these rates to achieve the target set at 12% by 2020 [12]. Novel endgame solutions such as prohibiting  
4 the sales of tobacco to citizens born after year 2000 and using plain packaging have been proposed  
5 [19].  
6  
7  
8  
9

10 It was noteworthy that as many as 1 in 4 adult males are current smokers accounting for the  
11 vast majority of smokers in the country, with males being 7 times more likely than females to be  
12 nicotine-dependent. More recently, Subramaniam and colleagues [20] through focus group  
13 discussions with Singaporean youths identified multiple personal (e.g. coping), social (e.g. for  
14 networking) and familial influences (e.g. early exposure) on young adults' smoking behaviours which  
15 provide actionable information for further anti-smoking initiatives. Factors such as traditional values,  
16 normative gender expectations, and economic independence have been purported for the wide margin  
17 of difference between the sexes [21].  
18  
19  
20  
21  
22  
23  
24  
25  
26  
27

28 Not surprisingly, smoking and nicotine dependence groups were overrepresented in those  
29 with lower or vocational qualifications and less likely to be associated with higher income. Marques-  
30 Vidal and colleagues [22] suggested that those with higher levels of education are more responsive to  
31 social initiatives to cut down smoking and anti-smoking messages or have more contact with  
32 exemplary role models. Despite the rising cigarette prices/taxes with the average cost of a pack of 20  
33 cigarettes priced at US\$9.66 (SGD\$13.31; [23], higher levels of smoking and nicotine dependence  
34 were observed among those with the lowest income levels suggesting alternative strategies are needed  
35 to reduce morbidity and mortality due to smoking for this group.  
36  
37  
38  
39  
40  
41  
42  
43  
44

45 Two other sociodemographic factors that were associated with current smoking prevalence  
46 were age and ethnic minority status (Malay and other ethnicity). An age effect was observed with the  
47 prevalence of smoking being higher in the younger age groups despite the combined efforts of raising  
48 the minimum age for smoking, increasing cigarette prices and smoking prevention and cessation  
49 programmes in institutes of higher learning in the recent years. Shahwan and colleagues [24] through  
50 focus group discussions with youths, identified various elements that were deemed to be efficacious in  
51 anti-smoking campaigns (e.g. positive tone, low-fear visual images, low 'controlling' language) which  
52 may be translated into continued efforts towards further reducing smoking rates in youths. With  
53  
54  
55  
56  
57  
58  
59  
60

1  
2  
3 regard to ethnicity, almost all Malays in Singapore are Muslims. While drinking alcohol is clearly  
4 forbidden in Islam, smoking is deemed by many Muslims as acceptable. Ethnic differences may also  
5 represent residual confounding by socio-economic influences that have not been adequately controlled  
6 using our proxy measures.  
7  
8  
9  
10

11  
12 The correlates of smoking and nicotine dependence identified in the current study (i.e. the  
13 association between smoking and younger age, males, ethnic minority, lower/vocational education)  
14 are similar to the findings of the 2010 study, representing the stability and persistence of these factors.  
15  
16  
17  
18

19 The relationship between being economically inactive and smoking is less clear. While  
20 unemployment is defined as being out of work and actively seeking work, economic inactivity exists  
21 when a person is without any form of employment and is not actively seeking work. The majority of  
22 individuals in the economic inactivity group consist of housewives, retirees and students. As such, we  
23 speculate that there were several protective factors against smoking for this group such as, higher  
24 education, spousal support, increasing health concerns with advancing age and the desire to improve  
25 longevity and quality of life.  
26  
27  
28  
29  
30  
31  
32  
33

34 Nicotine dependence was significantly associated with alcohol abuse as well as alcohol  
35 dependence. Nicotine-dependent individuals were 26 times more likely to abuse alcohol and about 3  
36 times more likely to be dependent on alcohol than those who were non-nicotine dependent.  
37  
38 Psychosocial factors such risk-prone personality traits, greater opportunities and inclinations to drink,  
39 have been widely accepted as reasons for the well-documented link between smoking and alcoholism  
40 [25]. However, these psychosocial factors may not completely account for the association between  
41 smoking and alcohol problems. Some authors have speculated that the progression from the use of  
42 alcohol and tobacco to abuse may be facilitated by effects of early-stage use on central reward  
43 circuitry [26].  
44  
45  
46  
47  
48  
49  
50  
51  
52  
53

54 An association between nicotine dependence and major depressive disorder (MDD) and  
55 bipolar disorder, which was not apparent in 2010, emerged in the current study. The proportion of  
56 individuals with nicotine dependence who had MDD and bipolar disorder increased from 7% to 14%  
57  
58  
59  
60

1  
2  
3 and 1% to 5% respectively. The prevalence of nicotine dependence in patients with mood disorders  
4 has been reported to range from 50-70% compared to 25% in the general population in other studies  
5 [27]. The comorbidity between nicotine dependence and mood disorders may be explained in at least  
6  
7 two ways. First, various studies have demonstrated shared genetic and environmental influences.  
8  
9 Second, it could also be argued that (i) depression increases the risks of smoking (i.e. through self-  
10 medication) or (ii) smoking increases the risk of depression [28]. Given that the proportion of MDD  
11 and bipolar disorder among individuals with nicotine dependence increased from 2010 to 2016,  
12  
13 further exploration of this relationship is warranted.  
14  
15  
16  
17  
18  
19  
20

21 A gender difference was found in the association between nicotine dependence and OCD  
22 where 26% of females with nicotine dependence had OCD compared to 2.5% for males. We identified  
23 three other studies that have similarly found an association between smoking and OCD only in  
24 females [29][30][31]. However, our finding differs from the vast majority of clinical studies that have  
25 shown that patients with OCD are less likely to smoke compared to the general population (e.g.  
26 [32][33]). As suggested by Wu and colleagues, this may have to do with differences between clinical  
27 and community samples and further research is needed to shed light on the association between  
28 nicotine dependence and OCD in males and females.  
29  
30  
31  
32  
33  
34  
35  
36  
37

38 Current population-level tobacco control interventions may be less effective for those with  
39 mental illness. Health promotion campaigns and smoking policies that use stigma (e.g. the peril that  
40 smokers bring to the rest of the population) as the main motivating factor for giving up smoking may  
41 contribute to social isolation among those with psychiatric disorders [34]. Thus, these efforts are more  
42 likely to perpetuate smoking inequalities than remove them. Cook and colleagues [35] found that  
43 individuals receiving mental health treatment are not only less likely to smoke but are more likely to  
44 quit, suggesting that the mental health facility is a promising setting to promote smoking cessation in  
45 this group.  
46  
47  
48  
49  
50  
51  
52  
53  
54

55 The study had several limitations. We did not include individuals below 18 years of age and  
56 did not assess other forms of smoking such as use of e-cigarettes which is gaining popularity despite  
57 its ban in Singapore. Secondly, we relied on self-report which could lead to an underestimation of true  
58  
59  
60

1  
2  
3 prevalence of nicotine dependence and associations with mental and medical conditions. Third, as this  
4 was a cross-sectional study, we are unable to determine causality. Fourth, although we achieved a fair  
5 response rate of 69.5%, there were sociodemographic differences between respondent and non-  
6 respondent groups. Respondents were more likely to be in the younger age group (i.e. 18-35 years  
7 compared to 35-49 years; OR=0.65,  $p<.0001$ ; 50-64 years; OR=0.68,  $p<.0001$ ; 65+years; OR= 0.82,  
8  $p=0.005$ ) and of Malay or Indian ethnicity (compared to Chinese; OR=1.87,  $p<.0001$  and OR=1.91,  
9  $p<.0001$  respectively). This could lead to obscuring true prevalence as mental health determinants  
10 differ between responders and non-responders [36]. In order to minimise the impact of this bias, non-  
11 response weighting was used to statistically adjust for these differences. The strengths of this study  
12 include the large sample size, the use of structured, well-validated instruments, and a methodology  
13 similar to the 2010 study that allows for a direct comparison between these two time-points.  
14  
15  
16  
17  
18  
19  
20  
21  
22  
23  
24  
25  
26  
27  
28  
29  
30  
31  
32  
33  
34  
35  
36  
37  
38  
39  
40  
41  
42  
43  
44  
45  
46  
47  
48  
49  
50  
51  
52  
53  
54  
55  
56  
57  
58  
59  
60

1  
2  
3 **Ethics approval.** The study was approved by the National Healthcare Group Domain Specific  
4  
5 Review Board.  
6  
7

8 **Funding.** The study was funded by the Ministry of Health Singapore and Temasek Foundation  
9  
10 Innovates.  
11  
12

13 **Conflict of interest.** The authors have no conflict of interest to declare.  
14  
15

16 **Contributors.** Chong Siow Ann, Mythily Subramaniam, and Janhavi Vaingankar was involved in the  
17  
18 planning of the study and provided advice and guidance throughout the conduct study, and manuscript  
19  
20 writing. Shazana Shahwan, Saleha Shafie, Sherilyn Chang, Rajeswari Sambasivam and Zhang Yun  
21  
22 jue were involved in the conduct of the study. Edimansyah Abdin conducted the statistical analyses.  
23  
24 Derrick Heng and Teo Yik Ying provided expert opinion. All authors reviewed the final document.  
25  
26

27 **Acknowledgements.** We would like to thank the interviewers who collected the data of the study.  
28  
29

30 **Data sharing statement.** No data are available.  
31  
32  
33  
34  
35  
36  
37  
38  
39  
40  
41  
42  
43  
44  
45  
46  
47  
48  
49  
50  
51  
52  
53  
54  
55  
56  
57  
58  
59  
60

## References

- 1 Méndez D, Alshanqeety O, Warner KE. The potential impact of smoking control policies on future global smoking trends. *Tob Control* 2013;**22**:46–51. doi:10.1136/tobaccocontrol-2011-050147
- 2 WHO | Parties to the WHO Framework Convention on Tobacco Control. *WHO* Published Online First: 2017. [https://www.who.int/fctc/signatories\\_parties/en/](https://www.who.int/fctc/signatories_parties/en/) (accessed 7 Mar 2019).
- 3 Mathers CD, Loncar D. Projections of Global Mortality and Burden of Disease from 2002 to 2030. *PLoS Med* 2006;**3**:e442. doi:10.1371/journal.pmed.0030442
- 4 Ng M, Freeman MK, Fleming TD, *et al.* Smoking Prevalence and Cigarette Consumption in 187 Countries, 1980-2012. *JAMA* 2014;**311**:183. doi:10.1001/jama.2013.284692
- 5 Bilano V, Gilmour S, Moffiet T, *et al.* Global trends and projections for tobacco use, 1990-2025: an analysis of smoking indicators from the WHO Comprehensive Information Systems for Tobacco Control. *Lancet (London, England)* 2015;**385**:966–76. doi:10.1016/S0140-6736(15)60264-1
- 6 Marcon A, Pesce G, Calciano L, *et al.* Trends in smoking initiation in Europe over 40 years: A retrospective cohort study. *PLoS One* 2018;**13**:e0201881. doi:10.1371/journal.pone.0201881
- 7 Hill S, Amos A, Clifford D, *et al.* Impact of tobacco control interventions on socioeconomic inequalities in smoking: review of the evidence. *Tob Control* 2014;**23**:e89-97. doi:10.1136/tobaccocontrol-2013-051110
- 8 Stringhini S, Sabia S, Shipley M, *et al.* Association of Socioeconomic Position With Health Behaviors and Mortality. *JAMA* 2010;**303**:1159. doi:10.1001/jama.2010.297
- 9 Lasser K, Boyd JW, Woolhandler S, *et al.* Smoking and mental illness: A population-based prevalence study. *JAMA* 2000;**284**:2606–10. <http://www.ncbi.nlm.nih.gov/pubmed/11086367> (accessed 7 Mar 2019).



- 1  
2  
3 10 Champion J, Checinski K, Nurse J, *et al.* Smoking by people with mental illness and benefits of  
4 smoke-free mental health services. *Adv Psychiatr Treat* 2008;**14**:217–28.  
5  
6 doi:10.1192/apt.bp.108.005710  
7  
8  
9  
10 11 Kessler RC, Chiu WT, Demler O, *et al.* Prevalence, Severity, and Comorbidity of 12-Month  
11 DSM-IV Disorders in the National Comorbidity Survey Replication. *Arch Gen Psychiatry*  
12 2005;**62**:617. doi:10.1001/archpsyc.62.6.617  
13  
14  
15  
16  
17 12 Amul GGH, Pang TP. Progress in Tobacco Control in Singapore: Lessons and Challenges in  
18 the Implementation of the Framework Convention on Tobacco Control. *Asia Pacific Policy*  
19 *Stud* 2018;**5**:102–21. doi:10.1002/app5.222  
20  
21  
22  
23  
24 13 Picco L, Subramaniam M, Abdin E, *et al.* Smoking and nicotine dependence in Singapore:  
25 findings from a cross-sectional epidemiological study. *Ann Acad Med Singapore* 2012;**41**:325–  
26 34. <http://www.ncbi.nlm.nih.gov/pubmed/23010809> (accessed 7 Mar 2019).  
27  
28  
29  
30  
31 14 Health Promotion Board. Health Promotion Board Unveils Two-Pronged Strategy to Step Up  
32 Tobacco Control Efforts on World No Tobacco Day. 2014;:1–  
33 4. [https://www.hpb.gov.sg/article/health-promotion-board-unveils-two-pronged-strategy-to-](https://www.hpb.gov.sg/article/health-promotion-board-unveils-two-pronged-strategy-to-step-up-tobacco-control-efforts-on-world-no-tobacco-day)  
34  
35  
36  
37  
38  
39  
40 15 Subramaniam M, Abdin E, Vaingankar JA, *et al.* Tracking the mental health of a nation:  
41 prevalence and correlates of mental disorders in the second Singapore mental health study.  
42 *Epidemiol Psychiatr Sci* 2019;:1–10. doi:10.1017/S2045796019000179  
43  
44  
45  
46  
47 16 Subramaniam M, Vaingankar J, Heng D, *et al.* The Singapore Mental Health Study: an  
48 overview of the methodology. *Int J Methods Psychiatr Res* 2012;**21**:149–57.  
49  
50  
51  
52  
53  
54 17 Manimunda SP, Benegal V, Sugunan AP, *et al.* Tobacco use and nicotine dependency in a  
55 cross-sectional representative sample of 18,018 individuals in Andaman and Nicobar Islands,  
56  
57  
58  
59  
60 India. *BMC Public Health* 2012;**12**:515. doi:10.1186/1471-2458-12-515

- 1  
2  
3 18 Lim SS, Vos T, Flaxman AD, *et al.* A comparative risk assessment of burden of disease and  
4 injury attributable to 67 risk factors and risk factor clusters in 21 regions, 1990-2010: a  
5 systematic analysis for the Global Burden of Disease Study 2010. *Lancet (London, England)*  
6 2012;**380**:2224–60. doi:10.1016/S0140-6736(12)61766-8  
7  
8  
9  
10  
11  
12 19 Chia KS. TODAYonline | Singapore should aim to be smoke-free, not just smoke-lite.  
13 TODAYonline. 2017.[https://www.todayonline.com/commentary/singapore-should-aim-be-](https://www.todayonline.com/commentary/singapore-should-aim-be-smoke-free-not-just-smoke-lite)  
14 [smoke-free-not-just-smoke-lite](https://www.todayonline.com/commentary/singapore-should-aim-be-smoke-free-not-just-smoke-lite) (accessed 7 Mar 2019).  
15  
16  
17  
18  
19 20 Subramaniam M, Shahwan S, Fauziana R, *et al.* Perspectives on Smoking Initiation and  
20 Maintenance: A Qualitative Exploration among Singapore Youth. *Int J Environ Res Public*  
21 *Health* 2015;**12**:8956–70. doi:10.3390/ijerph120808956  
22  
23  
24  
25  
26 21 Pierce JP, White VM, Emery SL. What public health strategies are needed to reduce smoking  
27 initiation? *Tob Control* 2012;**21**:258–64. doi:10.1136/tobaccocontrol-2011-050359  
28  
29  
30  
31 22 Marques-Vidal P, Cerveira J, Paccaud F, *et al.* Smoking trends in Switzerland, 1992–2007: a  
32 time for optimism? *J Epidemiol Community Heal* 2011;**65**:281–6.  
33 doi:10.1136/JECH.2009.099424  
34  
35  
36  
37  
38 23 Lim J-L. How Much Does Smoking Cost in Singapore?  
39 2018.<https://www.imoney.sg/articles/smoking-cost-singapore/> (accessed 8 Mar 2019).  
40  
41  
42  
43 24 Shahwan S, Fauziana R, Satghare P, *et al.* Qualitative study of Singaporean youths' perception  
44 of antismoking campaigns: what works and what does not. *Tob Control* 2016;**25**:e101–6.  
45 doi:10.1136/tobaccocontrol-2015-052692  
46  
47  
48  
49  
50 25 Dinn WM, Aycicegi A, Harris CL. Cigarette smoking in a student sample: neurocognitive and  
51 clinical correlates. *Addict Behav* 2004;**29**:107–  
52 26.<http://www.ncbi.nlm.nih.gov/pubmed/14667424> (accessed 8 Mar 2019).  
53  
54  
55  
56  
57 26 Doyon WM, Dong Y, Ostroumov A, *et al.* Nicotine Decreases Ethanol-Induced Dopamine  
58 Signaling and Increases Self-Administration via Stress Hormones. *Neuron* 2013;**79**:530–40.  
59  
60

- 1  
2  
3 doi:10.1016/j.neuron.2013.06.006  
4  
5  
6 27 Glassman AH, Helzer JE, Covey LS, *et al.* Smoking, smoking cessation, and major depression.  
7  
8 *JAMA* 1990;**264**:1546–9.<http://www.ncbi.nlm.nih.gov/pubmed/2395194> (accessed 8 Mar  
9  
10 2019).  
11  
12  
13 28 Munafò MR, Hitsman B, Rende R, *et al.* Effects of progression to cigarette smoking on  
14  
15 depressed mood in adolescents: evidence from the National Longitudinal Study of Adolescent  
16  
17 Health. *Addiction* 2008;**103**:162–71. doi:10.1111/j.1360-0443.2007.02052.x  
18  
19  
20 29 Grabe HJ, Meyer C, Hapke U, *et al.* Lifetime-comorbidity of obsessive-compulsive disorder  
21  
22 and subclinical obsessive-compulsive disorder in Northern Germany. *Eur Arch Psychiatry*  
23  
24 *Clin Neurosci* 2001;**251**:130–5.<http://www.ncbi.nlm.nih.gov/pubmed/11697574> (accessed 17  
25  
26 Aug 2019).  
27  
28  
29 30 Wu P, Goodwin RD, Fuller C, *et al.* The Relationship Between Anxiety Disorders and  
30  
31 Substance Use Among Adolescents in the Community: Specificity and Gender Differences. *J*  
32  
33 *Youth Adolesc* 2010;**39**:177–88. doi:10.1007/s10964-008-9385-5  
34  
35  
36 31 Dell’Osso B, Nicolini H, Lanzagorta N, *et al.* Cigarette smoking in patients with obsessive  
37  
38 compulsive disorder: a report from the International College of Obsessive Compulsive  
39  
40 Spectrum Disorders (ICOCS). *CNS Spectr* 2015;**20**:469–73. doi:10.1017/S1092852915000565  
41  
42  
43 32 Bejerot S, von Knorring L, Ekselius L. Personality traits and smoking in patients with  
44  
45 obsessive-compulsive disorder. *Eur Psychiatry* 2000;**15**:395–  
46  
47 401.<http://www.ncbi.nlm.nih.gov/pubmed/11112931> (accessed 17 Aug 2019).  
48  
49  
50 33 Abramovitch A, Pizzagalli DA, Geller DA, *et al.* Cigarette smoking in obsessive-compulsive  
51  
52 disorder and unaffected parents of OCD patients. *Eur Psychiatry* 2015;**30**:137–44.  
53  
54 doi:10.1016/j.eurpsy.2013.12.003  
55  
56  
57 34 Farrimond HR, Joffe H. Pollution, peril and poverty: a British study of the stigmatization of  
58  
59 smokers. *J Community Appl Soc Psychol* 2006;**16**:481–91. doi:10.1002/casp.896  
60

- 1  
2  
3 35 Cook BL, Wayne GF, Kafali EN, *et al.* Trends in Smoking Among Adults With Mental Illness  
4 and Association Between Mental Health Treatment and Smoking Cessation. *JAMA*  
5 2014;**311**:172. doi:10.1001/jama.2013.284985  
6  
7  
8  
9  
10 36 de Winter AF, Oldehinkel AJ, Veenstra R, *et al.* Evaluation of non-response bias in mental  
11 health determinants and outcomes in a large sample of pre-adolescents. *Eur J Epidemiol*  
12 2005;**20**:173–81. doi:10.1007/s10654-004-4948-6  
13  
14  
15  
16  
17  
18  
19  
20  
21  
22  
23  
24  
25  
26  
27  
28  
29  
30  
31  
32  
33  
34  
35  
36  
37  
38  
39  
40  
41  
42  
43  
44  
45  
46  
47  
48  
49  
50  
51  
52  
53  
54  
55  
56  
57  
58  
59  
60

For peer review only

## Tables

Table 1. Socio-demographic profile of the sample by smoking status

| Sociodemographic characteristics          | N                      | Smoking status             |           |            | Total |      |
|-------------------------------------------|------------------------|----------------------------|-----------|------------|-------|------|
|                                           |                        | Smoker                     | Ex-smoker | Non-smoker |       |      |
|                                           |                        | (N=1176)                   | (N=750)   | (N=4181)   |       |      |
|                                           |                        | <b>Weighted percentage</b> |           |            |       |      |
| <b>Age Group (years)</b><br>(Mean = 45.2) | 18-34                  | 1707                       | 35.1      | 23.7       | 30.5  | 30.4 |
|                                           | 35-49                  | 1496                       | 30.8      | 29.9       | 29.2  | 29.6 |
|                                           | 50-64                  | 1626                       | 27.1      | 28.4       | 26.6  | 26.9 |
|                                           | 65+                    | 1297                       | 7.0       | 18.0       | 13.7  | 13.1 |
| <b>Gender</b>                             | Female                 | 3058                       | 16.5      | 24.3       | 61.7  | 50.4 |
|                                           | Male                   | 3068                       | 83.5      | 75.7       | 38.3  | 49.6 |
| <b>Ethnicity</b>                          | Chinese                | 1782                       | 63.7      | 71.1       | 79.0  | 75.7 |
|                                           | Malay                  | 1990                       | 23.9      | 16.3       | 9.4   | 12.5 |
|                                           | Indian                 | 1844                       | 9.8       | 8.3        | 8.5   | 8.7  |
|                                           | Others                 | 510                        | 2.6       | 4.3        | 3.1   | 3.1  |
| <b>Marital Status</b>                     | Never Married          | 1544                       | 35.5      | 22.6       | 31.3  | 31   |
|                                           | Married                | 3843                       | 54.7      | 66.8       | 59.8  | 59.8 |
|                                           | Divorced / Separated   | 343                        | 7.9       | 7.8        | 4.2   | 5.2  |
|                                           | Widowed                | 396                        | 2.0       | 2.8        | 4.7   | 4.1  |
| <b>Education</b>                          | Primary and below      | 1187                       | 21.8      | 20.8       | 14.4  | 16.3 |
|                                           | Secondary              | 1648                       | 29.6      | 25.3       | 21.2  | 23   |
|                                           | Pre-U/Junior College   | 304                        | 3.2       | 4.6        | 6.8   | 6    |
|                                           | Vocational/ITE         | 508                        | 15.9      | 8.8        | 3.8   | 6.3  |
|                                           | Diploma                | 1024                       | 18.8      | 18.2       | 19.2  | 19   |
| <b>Employment</b>                         | University             | 1455                       | 10.7      | 22.3       | 34.6  | 29.4 |
|                                           | Employed               | 4055                       | 83.4      | 73.5       | 69.3  | 72   |
|                                           | Economically inactive* | 1716                       | 9.3       | 22.0       | 25.8  | 22.7 |
| <b>Household Income (SGD/month)</b>       | Unemployed             | 354                        | 7.3       | 4.5        | 4.8   | 5.3  |
|                                           | Below 2000             | 1147                       | 21.0      | 20.8       | 14.8  | 16.5 |
|                                           | 2,000 – 3,999          | 1331                       | 27.2      | 18.1       | 18.7  | 20   |
|                                           | 4,000 – 5,999          | 1113                       | 23.0      | 21.2       | 21.0  | 21.4 |
|                                           | 6,000 – 9,999          | 1003                       | 19.4      | 20.0       | 22.7  | 21.8 |
|                                           | 10,000 & above         | 861                        | 9.5       | 19.9       | 22.8  | 20.3 |

\* Includes homemakers, students and retirees / pensioners; SGD- Singapore Dollars;

Table 2. Comparison of the prevalence of Current smokers, Ex-smokers and Nicotine Dependence in SMHS 2010 and SMHS 2016

|                     | 2010 | 2016 | p value |
|---------------------|------|------|---------|
| Current smokers     | 16.0 | 16.1 | n.s.    |
| Male                | 27.0 | 27.1 | n.s.    |
| Females             | 5.6  | 5.3  | n.s.    |
| Ex-smokers          | 10.8 | 10.5 | n.s.    |
| Nicotine dependence | 4.5  | 3.3  | 0.007   |

Chi square analysis; n.s. : not statistically significant

Table 3. Sociodemographic correlates of current smoking and ex-smokers

|                  |                    | Current smoker vs Non-smoker |                    |                  | Ex-smoker versus Non-smoker |                   |                  |
|------------------|--------------------|------------------------------|--------------------|------------------|-----------------------------|-------------------|------------------|
|                  |                    | OR                           | 95% CI             | p value          | OR                          | 95% CI            | p value          |
| Age group        | 18-34              | Ref                          |                    |                  | Ref                         |                   |                  |
|                  | 35-49              | 0.9                          | (.6, 1.3)          | 0.48             | 1.1                         | (.7, 1.6)         | 0.84             |
|                  | 50-64              | <b>0.4</b>                   | <b>(.2, .6)</b>    | <b>&lt;.0001</b> | 0.7                         | (.5, 1.2)         | 0.18             |
|                  | 65 and above       | <b>0.2</b>                   | <b>(.1, .4)</b>    | <b>&lt;.0001</b> | 0.8                         | (.5,1.4)          | 0.43             |
| Gender           | Male               | <b>8.8</b>                   | <b>(6.5, 11.8)</b> | <b>&lt;.0001</b> | <b>5.5</b>                  | <b>(4.0, 7.5)</b> | <b>&lt;.0001</b> |
|                  | Female             | Ref                          |                    |                  | Ref                         |                   |                  |
| Ethnicity        | Chinese            | Ref                          |                    |                  | Ref                         |                   |                  |
|                  | Malay              | <b>2.4</b>                   | <b>(1.9, 3.0)</b>  | <b>&lt;.0001</b> | <b>1.9</b>                  | <b>(1.5, 2.5)</b> | <b>&lt;.0001</b> |
|                  | Indian             | <b>1.4</b>                   | <b>(1.1, 1.8)</b>  | <b>0.004</b>     | 1.1                         | (.9, 1.5)         | 0.32             |
|                  | Others             | <b>1.7</b>                   | <b>(1.2, 2.6)</b>  | <b>0.008</b>     | <b>2.0</b>                  | <b>(1.3, 2.8)</b> | <b>0.001</b>     |
| Marital          | Single             | Ref                          |                    |                  | Ref                         |                   |                  |
|                  | Married            | 0.9                          | (.6, 1.2)          | 0.42             | 1.3                         | (.8, 2.0)         | 0.27             |
|                  | Divorced/Separated | <b>1.9</b>                   | <b>(1.1, 3.5)</b>  | <b>0.04</b>      | <b>2.5</b>                  | <b>(1.3, 4.8)</b> | <b>0.008</b>     |
|                  | Widowed            | 0.8                          | (.3, 1.8)          | 0.57             | 0.7                         | (.3, 1.8)         | 0.52             |
| Education        | Primary            | <b>13.8</b>                  | <b>(7.9, 24.1)</b> | <b>&lt;.0001</b> | 3.8                         | <b>(2.3, 6.3)</b> | <b>&lt;.0001</b> |
|                  | Secondary          | <b>7.3</b>                   | <b>(4.5, 12.0)</b> | <b>&lt;.0001</b> | 2.6                         | <b>(1.7, 4.1)</b> | <b>&lt;.0001</b> |
|                  | Pre-U/JC/Diploma   | 1.7                          | (.8, 3.8)          | 0.185            | 1.5                         | (.7, 3.0)         | 0.26             |
|                  | Vocational/ITE     | <b>7.8</b>                   | <b>(4.7, 13.0)</b> | <b>&lt;.0001</b> | <b>3.1</b>                  | <b>(1.8, 5.3)</b> | <b>&lt;.0001</b> |
|                  | Diploma            | <b>3.1</b>                   | <b>(2.0, 4.8)</b>  | <b>&lt;.0001</b> | 1.8                         | <b>(1.2, 2.8)</b> | <b>0.008</b>     |
| University       | University         | Ref                          |                    |                  | Ref                         |                   |                  |
|                  | Employment         | Employed                     | Ref                |                  |                             | Ref               |                  |
|                  |                    | Economically inactive        | <b>0.3</b>         | <b>(.2, .5)</b>  | <b>&lt;.0001</b>            | 0.9               | (.6, 1.3)        |
| Unemployed       |                    | 0.9                          | (.5, 1.5)          | 0.65             | 0.9                         | (.5, 1.6)         | 0.8              |
| Household Income | <SGD 2000          | Ref                          |                    |                  | Ref                         |                   |                  |
|                  | SGD 2000-3999      | 0.8                          | (.6, 1.2)          | 0.23             | 0.7                         | (.5, 1.1)         | 0.1              |
|                  | SGD 4000-5999      | 0.8                          | (.5, 1.1)          | 0.16             | 0.8                         | (.5, 1.3)         | 0.43             |
|                  | SGD 6000-9999      | 0.9                          | (.6, 1.3)          | 0.45             | 0.9                         | (.5, 1.4)         | 0.54             |
|                  | <b>≥SGD 10 000</b> | <b>0.6</b>                   | <b>(.3, 1.0)</b>   | <b>0.04</b>      | 1.0                         | (.6, 1.6)         | 0.88             |

Multinomial logistic regression analysis controlled for potential confounders including age, ethnicity, marital status, education, employment and household income. OR: Odds Ratio; CI: Confidence Intervals

Table 4. Sociodemographic correlates of Nicotine Dependence

|                     |                              | OR          | 95% CI              | P value          |
|---------------------|------------------------------|-------------|---------------------|------------------|
| Age group           | 18-34                        | Ref         |                     |                  |
|                     | 35-49                        | 0.6         | (.3, 1.1)           | 0.34             |
|                     | 50-64                        | <b>0.3</b>  | <b>(.2, .6)</b>     | <b>0.001</b>     |
|                     | 65 and above                 | <b>0.3</b>  | <b>(.1, .7)</b>     | <b>0.007</b>     |
| Gender              | Male                         | <b>6.9</b>  | <b>(3.6, 13.2)</b>  | <b>&lt;.0001</b> |
|                     | Female                       | Ref         |                     |                  |
| Ethnicity           | Chinese                      | Ref         |                     |                  |
|                     | Malay                        | 1.5         | (.9, 2.3)           | 0.1              |
|                     | Indian                       | 1.3         | (.8, 2.0)           | 0.31             |
|                     | Others                       | 1.4         | (.6, 3.2)           | 0.41             |
| Marital             | Single                       | Ref         |                     |                  |
|                     | Married                      | 0.8         | (.5, 1.5)           | 0.5              |
|                     | Divorced/Separated           | 0.8         | (.3, 1.8)           | 0.57             |
|                     | Widowed                      | 1.7         | (.4, 6.7)           | 0.43             |
| Education           | <b>Primary</b>               | <b>37.0</b> | <b>(8.3, 165.1)</b> | <b>&lt;.0001</b> |
|                     | <b>Secondary</b>             | <b>23.3</b> | <b>(5.8, 92.6)</b>  | <b>&lt;.0001</b> |
|                     | Pre-U/JC/                    | 2.1         | (.4, 9.8)           | 0.359            |
|                     | <b>Vocational/ITE</b>        | <b>16.0</b> | <b>(4.0, 63.8)</b>  | <b>&lt;.0001</b> |
|                     | <b>Diploma</b>               | <b>10.0</b> | <b>(2.7, 37.0)</b>  | <b>&lt;.0001</b> |
|                     | University                   | Ref         |                     |                  |
| Employment          | Employed                     | Ref         |                     |                  |
|                     | <b>Economically inactive</b> | <b>0.1</b>  | <b>(.1, .3)</b>     | <b>&lt;.0001</b> |
|                     | Unemployed                   | 0.6         | (.3, 1.4)           | 0.26             |
| Household<br>Income | <SGD 2000                    | Ref         |                     |                  |
|                     | SGD 2000-3900                | 0.8         | (.5, 1.5)           | 0.56             |
|                     | <b>SGD 4000-5999</b>         | <b>0.4</b>  | <b>(.2, .8)</b>     | <b>0.009</b>     |
|                     | SGD 6000-9999                | 0.6         | (.3, 1.4)           | 0.24             |
|                     | 10 000 and above             | 0.6         | (.2, 1.4)           | 0.21             |



Table 5. Prevalence and odds ratio of other lifetime psychiatric disorders in people with nicotine dependence

| Lifetime psychiatric disorders   | Sample       | %           | SE         | OR         | 95% CI             | p value          |
|----------------------------------|--------------|-------------|------------|------------|--------------------|------------------|
| <b>Major Depressive Disorder</b> | <b>Total</b> | <b>14.8</b> | <b>0.4</b> | <b>3.0</b> | <b>(1.7, 5.5)</b>  | <b>&lt;.0001</b> |
|                                  | Males        | 14.9        | 3.9        | 3.3        | (1.7, 6.5)         | <.0001           |
|                                  | Females      | 13.6        | 5.7        | 1.6        | (.6,4.4)           | 0.359            |
| Dysthymia                        |              | 0.1         | 0.0        | 0.4        | (.1, 3.5)          | 0.420            |
|                                  | Males        | 0.1         | 0.1        | 0.5        | (.06, 4.9)         | 0.590            |
|                                  | Females      | 0.0         | 0.0        | .          | .                  | .                |
| <b>Bipolar Disorder</b>          |              | <b>5.2</b>  | <b>0.0</b> | <b>3.7</b> | <b>(1.6, 8.8)</b>  | <b>0.003</b>     |
|                                  | Males        | 5.1         | 2.2        | 4.0        | (1.5,10.8)         | 0.006            |
|                                  | Females      | 5.8         | 3.5        | 2.9        | (.7,11.2)          | 0.131            |
| Generalised Anxiety Disorder     |              | 1.6         | 0.0        | 1.0        | (.4, 2.2)          | 0.960            |
|                                  | Males        | 1.3         | 0.6        | 0.7        | (.3,1.9)           | 0.540            |
|                                  | Females      | 4.9         | 3.1        | 2.5        | (.6,10.2)          | 0.210            |
| Obsessive Compulsive Disorder    |              | 5.1         | 0.0        | 1.5        | (.6,3.7)           | 0.340            |
|                                  | Males        | 2.5         | 0.8        | 0.7        | (.4,1.6)           | 0.429            |
|                                  | Females      | 26.4        | 13.9       | 6.2        | (1.5, 24.6)        | 0.010            |
| <b>Alcohol Abuse</b>             |              | <b>25.8</b> | <b>0.0</b> | <b>6.7</b> | <b>(4.0, 11.3)</b> | <b>&lt;.0001</b> |
|                                  | Males        | 27.2        | 4.7        | 6.7        | (3.9,11.4)         | <.0001           |
|                                  | Females      | 14.2        | 11.2       | 5.9        | (.9,37.2)          | 0.060            |
| <b>Alcohol dependence</b>        |              | <b>3.0</b>  | <b>0.0</b> | <b>4.0</b> | <b>(1.4,11.5)</b>  | <b>0.009</b>     |
|                                  | Males        | 2.7         | 1.2        | 3.2        | (1.0, 10.0)        | 0.040            |
|                                  | Females      | 5.3         | 3.3        | 25.7       | (5.8,113.8)        | <.0001           |

Multiple logistic regression analyses in total sample and by gender-specification, adjusted for age. SE:

standard error

## Supplementary Tables

Supplementary Table 1. Prevalence of current smokers, ex-smokers, nicotine dependence by age group and gender

|                     | Males       |             |             | Females    |            |                  |
|---------------------|-------------|-------------|-------------|------------|------------|------------------|
|                     | 2010        | 2016        | p value     | 2010       | 2016       | p value          |
| Current smokers     |             |             |             |            |            |                  |
| 18-34               | 31.1        | 28.1        | 0.27        | 9.3        | 8.1        | 0.44             |
| 35-49               | 25.9        | 28.9        | 0.31        | 5.6        | 6.2        | 0.71             |
| 50-64               | 24.8        | 28.5        | 0.24        | 2.3        | 3.3        | 0.46             |
| 65+                 | 23.1        | 17.0        | 0.08        | 1.6        | 1.0        | 0.64             |
| Ex-smokers          |             |             |             |            |            |                  |
| 18-34               | 8.3         | 9.3         | 0.59        | 5.4        | 7.0        | 0.24             |
| 35-49               | 16.9        | 16.9        | 0.99        | 3.8        | 5.2        | 0.27             |
| 50-64               | 20.5        | 18.0        | 0.39        | 2.9        | 3.8        | 0.48             |
| 65+                 | <b>39.2</b> | <b>26.9</b> | <b>0.02</b> | 6.9        | 3.0        | 0.10             |
| Nicotine dependence |             |             |             |            |            |                  |
| 18-34               | 8.1         | 6.4         | 0.25        | 2.1        | 1.7        | 0.60             |
| 35-49               | 7.1         | 6.1         | 0.54        | <b>2.1</b> | <b>0.4</b> | <b>&lt;0.001</b> |
| 50-64               | 7.6         | 6.1         | 0.39        | 1.4        | 0.5        | 0.19             |
| 65+                 | 6.9         | 3.6         | 0.17        | .          | .          | .                |

Chi square analysis; (.) denotes missing or less than 5 cases

Supplementary Table 2a. Sociodemographic correlates of current and former smoking status among males

|                  |                              | <u>Current smoker vs Non-smoker</u> |            |             |                  | <u>Ex-smoker versus Non-smoker</u> |            |            |              |
|------------------|------------------------------|-------------------------------------|------------|-------------|------------------|------------------------------------|------------|------------|--------------|
|                  |                              | OR                                  | 95% CI     |             | P value          | OR                                 | 95% CI     |            | P value      |
| Age group        | 18-34                        | Ref                                 |            |             |                  | Ref                                |            |            |              |
|                  | 35-49                        | 1.3                                 | 0.8        | 2.0         | 0.321            | <b>2.0</b>                         | <b>1.2</b> | <b>3.5</b> | <b>0.013</b> |
|                  | <b>50-64</b>                 | <b>0.6</b>                          | <b>0.3</b> | <b>0.9</b>  | <b>0.028</b>     | 1.4                                | 0.8        | 2.4        | 0.270        |
|                  | <b>65 and above</b>          | <b>0.3</b>                          | <b>0.2</b> | <b>0.6</b>  | <b>0.001</b>     | 1.4                                | 0.8        | 2.7        | 0.272        |
| Ethnicity        | Chinese                      | Ref                                 |            |             |                  | Ref                                |            |            |              |
|                  | <b>Malay</b>                 | <b>2.7</b>                          | <b>2.0</b> | <b>3.5</b>  | <b>&lt;0.001</b> | <b>2.1</b>                         | <b>1.6</b> | <b>2.9</b> | <b>0.000</b> |
|                  | <b>Indian</b>                | <b>1.4</b>                          | <b>1.1</b> | <b>1.9</b>  | <b>0.010</b>     | 1.2                                | 0.9        | 1.6        | 0.298        |
|                  | Others                       | 1.4                                 | 0.9        | 2.3         | 0.123            | <b>1.6</b>                         | <b>1.0</b> | <b>2.6</b> | <b>0.041</b> |
| Marital          | Single                       | Ref                                 |            |             |                  | Ref                                |            |            |              |
|                  | Married                      | 0.9                                 | 0.6        | 1.4         | 0.657            | 1.1                                | 0.7        | 1.9        | 0.602        |
|                  | Divorced/Separated           | 1.6                                 | 0.7        | 3.8         | 0.296            | 2.1                                | 0.9        | 5.3        | 0.104        |
|                  | Widowed                      | 2.0                                 | 0.5        | 7.1         | 0.301            | 0.6                                | 0.1        | 2.2        | 0.399        |
| Education        | <b>Primary</b>               | <b>13.3</b>                         | <b>7.0</b> | <b>25.3</b> | <b>&lt;0.001</b> | <b>5.0</b>                         | <b>2.7</b> | <b>9.3</b> | <b>0.000</b> |
|                  | <b>Secondary</b>             | <b>6.3</b>                          | <b>3.7</b> | <b>10.8</b> | <b>&lt;0.001</b> | <b>3.3</b>                         | <b>2.0</b> | <b>5.5</b> | <b>0.000</b> |
|                  | Pre-U/JC/Diploma             | 1.9                                 | 0.8        | 4.5         | 0.125            | 1.3                                | 0.6        | 3.0        | 0.544        |
|                  | <b>Vocational/ITE</b>        | <b>7.4</b>                          | <b>4.2</b> | <b>12.8</b> | <b>&lt;0.001</b> | <b>3.3</b>                         | <b>1.7</b> | <b>6.4</b> | <b>0.000</b> |
|                  | <b>Diploma</b>               | <b>2.8</b>                          | <b>1.7</b> | <b>4.5</b>  | <b>&lt;0.001</b> | <b>2.4</b>                         | <b>1.5</b> | <b>4.1</b> | <b>0.001</b> |
| Employment       | University                   | Ref                                 |            |             |                  | Ref                                |            |            |              |
|                  | Employed                     | Ref                                 |            |             |                  | Ref                                |            |            |              |
|                  | <b>Economically inactive</b> | <b>0.4</b>                          | <b>0.3</b> | <b>0.7</b>  | <b>0.001</b>     | 1.2                                | 0.8        | 2.0        | 0.401        |
|                  | Unemployed                   | 1.0                                 | 0.6        | 1.9         | 0.924            | 1.2                                | 0.6        | 2.5        | 0.557        |
| Household Income | <SGD 2000                    | Ref                                 |            |             |                  | Ref                                |            |            |              |
|                  | SGD 2000-3999                | 1.0                                 | 0.6        | 1.5         | 0.920            | 0.7                                | 0.4        | 1.3        | 0.257        |
|                  | SGD 4000-5999                | 0.9                                 | 0.5        | 1.4         | 0.548            | 0.8                                | 0.5        | 1.4        | 0.385        |
|                  | SGD 6000-9999                | 0.9                                 | 0.6        | 1.6         | 0.810            | 0.9                                | 0.5        | 1.6        | 0.708        |
|                  | <b>≥SGD 10 000</b>           | <b>0.5</b>                          | <b>0.3</b> | <b>1.0</b>  | <b>0.048</b>     | 1.1                                | 0.6        | 2.1        | 0.667        |

Multinomial logistic regression analysis controlled for potential confounders including age, ethnicity, marital status, education, employment and household income.

Supplementary Table 2b. Sociodemographic correlates of current and former smoking status among females

|                  |                              | <u>Current smoker vs Non-smoker</u> |            |             |                  | <u>Ex-smoker versus Non-smoker</u> |            |            |              |
|------------------|------------------------------|-------------------------------------|------------|-------------|------------------|------------------------------------|------------|------------|--------------|
|                  |                              | OR                                  | 95% CI     | p value     |                  | OR                                 | 95% CI     | p value    |              |
| Age group        | 18-34                        | Ref                                 |            |             |                  | Ref                                |            |            |              |
|                  | 35-49                        | 0.4                                 | 0.2        | 0.9         | 0.019            | <b>0.4</b>                         | <b>0.2</b> | <b>0.8</b> | <b>0.016</b> |
|                  | <b>50-64</b>                 | <b>0.1</b>                          | <b>0.0</b> | <b>0.3</b>  | <b>&lt;0.001</b> | <b>0.2</b>                         | <b>0.1</b> | <b>0.5</b> | <b>0.001</b> |
|                  | <b>65 and above</b>          | <b>0.1</b>                          | <b>0.0</b> | <b>0.3</b>  | <b>&lt;0.001</b> | <b>0.1</b>                         | <b>0.0</b> | <b>0.4</b> | <b>0.001</b> |
| Ethnicity        | Chinese                      | Ref                                 |            |             |                  | Ref                                |            |            |              |
|                  | <b>Malay</b>                 | <b>1.9</b>                          | <b>1.2</b> | <b>3.0</b>  | <b>0.005</b>     | 1.7                                | 1.0        | 2.7        | 0.032        |
|                  | Indian                       | 1.3                                 | 0.8        | 2.2         | 0.300            | 1.0                                | 0.6        | 1.6        | 0.904        |
|                  | <b>Others</b>                | <b>2.3</b>                          | <b>1.1</b> | <b>5.1</b>  | <b>0.033</b>     | <b>2.5</b>                         | <b>1.3</b> | <b>4.8</b> | <b>0.005</b> |
| Marital          | Single                       | Ref                                 |            |             |                  | Ref                                |            |            |              |
|                  | Married                      | 0.6                                 | 0.3        | 1.2         | 0.138            | 1.4                                | 0.7        | 2.8        | 0.381        |
|                  | Divorced/Separated           | 2.3                                 | 1.0        | 5.4         | 0.064            | <b>3.5</b>                         | <b>1.3</b> | <b>9.5</b> | <b>0.013</b> |
|                  | <b>Widowed</b>               | <b>0.2</b>                          | <b>0.0</b> | <b>0.7</b>  | <b>0.010</b>     | 2.3                                | 0.7        | 8.1        | 0.187        |
| Education        | <b>Primary</b>               | <b>22.3</b>                         | <b>6.4</b> | <b>78.1</b> | <b>&lt;0.001</b> | <b>3.2</b>                         | <b>1.2</b> | <b>8.5</b> | <b>0.021</b> |
|                  | <b>Secondary</b>             | <b>13.6</b>                         | <b>4.6</b> | <b>39.8</b> | <b>&lt;0.001</b> | 1.7                                | 0.7        | 4.0        | 0.242        |
|                  | Pre-U/JC/Diploma             | 0.3                                 | 0.0        | 2.2         | 0.216            | 1.9                                | 0.6        | 5.6        | 0.260        |
|                  | <b>Vocational/IITE</b>       | <b>8.1</b>                          | <b>2.9</b> | <b>22.3</b> | <b>&lt;0.001</b> | <b>3.3</b>                         | <b>1.3</b> | <b>8.5</b> | <b>0.011</b> |
|                  | <b>Diploma</b>               | <b>4.6</b>                          | <b>1.7</b> | <b>11.9</b> | <b>0.002</b>     | 0.8                                | 0.4        | 1.8        | 0.574        |
|                  | University                   | Ref                                 |            |             |                  | Ref                                |            |            |              |
| Employment       | Employed                     | Ref                                 |            |             |                  | Ref                                |            |            |              |
|                  | <b>Economically inactive</b> | <b>0.2</b>                          | <b>0.1</b> | <b>0.4</b>  | <b>&lt;0.001</b> | 0.7                                | 0.4        | 1.2        | 0.176        |
|                  | Unemployed                   | 0.8                                 | 0.3        | 2.2         | 0.645            | 0.5                                | 0.2        | 1.5        | 0.207        |
| Household Income | <SGD 2000                    |                                     |            |             |                  |                                    |            |            |              |
|                  | <b>SGD 2000-3999</b>         | <b>0.5</b>                          | <b>0.2</b> | <b>0.9</b>  | <b>0.035</b>     | 0.9                                | 0.5        | 1.7        | 0.714        |
|                  | SGD 4000-5999                | 0.5                                 | 0.3        | 1.1         | 0.073            | 1.3                                | 0.6        | 2.5        | 0.497        |
|                  | SGD 6000-9999                | 0.7                                 | 0.3        | 1.6         | 0.418            | 1.1                                | 0.5        | 2.4        | 0.888        |
|                  | ≥SGD 10 000                  | 0.9                                 | 0.3        | 2.2         | 0.760            | 0.8                                | 0.3        | 2.1        | 0.645        |

Multinomial logistic regression analysis controlled for potential confounders including age, ethnicity, marital status, education, employment and household income.

Supplementary Table 3a. Sociodemographic correlates of Nicotine Dependence among Males

|                  |                              | OR          | 95% CI     |              | P value          |
|------------------|------------------------------|-------------|------------|--------------|------------------|
| Age group        | 18-34                        | Ref         |            |              |                  |
|                  | 35-49                        | 0.9         | 0.5        | 1.6          | 0.666            |
|                  | <b>50-64</b>                 | <b>0.4</b>  | <b>0.2</b> | <b>0.9</b>   | <b>0.018</b>     |
|                  | 65 and above                 | 0.3         | 0.1        | 0.9          | 0.038            |
| Ethnicity        | Chinese                      | Ref         |            |              |                  |
|                  | Malay                        | 1.4         | 0.9        | 2.2          | 0.163            |
|                  | Indian                       | 1.3         | 0.8        | 2.1          | 0.343            |
|                  | Others                       | 1.2         | 0.5        | 3.3          | 0.701            |
| Marital          | Single                       | Ref         |            |              |                  |
|                  | Married                      | 0.8         | 0.4        | 1.4          | 0.432            |
|                  | Divorced/Separated           | 1.0         | 0.2        | 1.8          | 0.415            |
|                  | Widowed                      | 3.3         | 0.7        | 15.7         | 0.134            |
| Education        | <b>Primary</b>               | <b>33.0</b> | <b>6.3</b> | <b>171.8</b> | <b>&lt;0.001</b> |
|                  | <b>Secondary</b>             | <b>21.1</b> | <b>4.6</b> | <b>97.4</b>  | <b>&lt;0.001</b> |
|                  | Pre-U/JC/                    | 1.5         | 0.3        | 8.5          | 0.622            |
|                  | <b>Vocational/ITE</b>        | <b>16.1</b> | <b>3.5</b> | <b>72.9</b>  | <b>&lt;0.001</b> |
|                  | Diploma                      | 8.0         | 1.9        | 34.2         | 0.005            |
| Employment       | University                   | Ref         |            |              |                  |
|                  | Employed                     | Ref         |            |              |                  |
|                  | <b>Economically inactive</b> | <b>0.2</b>  | <b>0.1</b> | <b>0.4</b>   | <b>&lt;0.001</b> |
|                  | Unemployed                   | 0.6         | 0.3        | 1.7          | 0.362            |
| Household Income | Below SGD 2000               | Ref         |            |              |                  |
|                  | SGD 2000-3900                | 0.8         | 0.4        | 1.5          | 0.558            |
|                  | <b>SGD 4000-5999</b>         | <b>0.4</b>  | <b>0.2</b> | <b>0.9</b>   | <b>0.031</b>     |
|                  | SGD 6000-9999                | 0.6         | 0.2        | 1.4          | 0.199            |
|                  | 10 000 and above             | 0.6         | 0.2        | 1.8          | 0.318            |

Multiple logistic regression analysis controlled for potential confounders including age, ethnicity, marital status, education, employment and household income.

Supplementary Table 3b. Sociodemographic correlates of Nicotine Dependence among Females

|                  |                             | OR           | 95%<br>CI  |               | P<br>value       |
|------------------|-----------------------------|--------------|------------|---------------|------------------|
| Age group        | 18-34                       | Ref          |            |               |                  |
|                  | <b>35-49</b>                | <b>0.1</b>   | <b>0.0</b> | <b>0.3</b>    | <b>&lt;0.001</b> |
|                  | <b>50-64</b>                | <b>0.1</b>   | <b>0.0</b> | <b>0.5</b>    | <b>0.004</b>     |
|                  | 65 and above                | .            | .          | .             | .                |
| Ethnicity        | Chinese                     | Ref          |            |               |                  |
|                  | Malay                       | 1.9          | 0.7        | 5.6           | 0.224            |
|                  | Indian                      | 1.5          | 0.4        | 5.4           | 0.522            |
|                  | Others                      | 2.3          | 0.4        | 14.4          | 0.389            |
| Marital          | Single                      | Ref          |            |               |                  |
|                  | Married                     | 0.8          | 0.2        | 3.5           | 0.812            |
|                  | Divorced/Separated          | 1.7          | 0.4        | 7.3           | 0.479            |
|                  | Widowed                     | .            | .          | .             | .                |
| Education        | <b>Primary</b>              | <b>103.0</b> | <b>8.3</b> | <b>1272.6</b> | <b>&lt;0.001</b> |
|                  | <b>Secondary</b>            | <b>61.8</b>  | <b>7.4</b> | <b>514.9</b>  | <b>&lt;0.001</b> |
|                  | Pre-U/JC/<br>Vocational/ITE | 13.3         | 0.8        | 218.8         | 0.070            |
|                  | <b>Diploma</b>              | <b>36.8</b>  | <b>4.3</b> | <b>314.1</b>  | <b>0.001</b>     |
|                  | University                  | Ref          |            |               |                  |
| Employment       | Employed                    | Ref          |            |               |                  |
|                  | Economically inactive       | .            | .          | .             | .                |
|                  | Unemployed                  | 0.6          | 0.2        | 2.4           | 0.489            |
| Household Income | Below SGD 2000              | Ref          |            |               |                  |
|                  | SGD 2000-3900               | 1.0          | 0.3        | 3.8           | 0.987            |
|                  | <b>SGD 4000-5999</b>        | <b>0.0</b>   | <b>0.0</b> | <b>0.5</b>    | <b>0.010</b>     |
|                  | SGD 6000-9999               | 1.1          | 0.3        | 4.1           | 0.914            |
|                  | 10 000 and above            | 0.4          | 0.1        | 2.1           | 0.300            |

Multiple logistic regression analysis controlled for potential confounders including

age, ethnicity, marital status, education, employment and household income.

(.) denotes missing or less than 5 cases

**STROBE Statement**

## Checklist of items that should be included in reports of observational studies

| Section/Topic                                                                                      | Item No | Recommendation                                                                                                                                                                             | Reported on Page No |
|----------------------------------------------------------------------------------------------------|---------|--------------------------------------------------------------------------------------------------------------------------------------------------------------------------------------------|---------------------|
| <b>Title and abstract</b>                                                                          | 1       | (a) Indicate the study's design with a commonly used term in the title or the abstract                                                                                                     | 1-2                 |
|                                                                                                    |         | (b) Provide in the abstract an informative and balanced summary of what was done and what was found                                                                                        | 2                   |
| <b>Introduction</b>                                                                                |         |                                                                                                                                                                                            |                     |
| Background/rationale                                                                               | 2       | Explain the scientific background and rationale for the investigation being reported                                                                                                       | 4-5                 |
| Objectives                                                                                         | 3       | State specific objectives, including any prespecified hypotheses                                                                                                                           | 5                   |
| <b>Methods</b>                                                                                     |         |                                                                                                                                                                                            |                     |
| Study design                                                                                       | 4       | Present key elements of study design early in the paper                                                                                                                                    | 5-6                 |
| Setting                                                                                            | 5       | Describe the setting, locations, and relevant dates, including periods of recruitment, exposure, follow-up, and data collection                                                            | 5                   |
| Participants                                                                                       | 6       | (a) <i>Cohort study</i> —Give the eligibility criteria, and the sources and methods of selection of participants. Describe methods of follow-up                                            | 5-6                 |
|                                                                                                    |         | <i>Case-control study</i> —Give the eligibility criteria, and the sources and methods of case ascertainment and control selection. Give the rationale for the choice of cases and controls |                     |
|                                                                                                    |         | <i>Cross-sectional study</i> —Give the eligibility criteria, and the sources and methods of selection of participants                                                                      |                     |
| Variables                                                                                          | 7       | (b) <i>Cohort study</i> —For matched studies, give matching criteria and number of exposed and unexposed                                                                                   | -                   |
|                                                                                                    |         | <i>Case-control study</i> —For matched studies, give matching criteria and the number of controls per case                                                                                 | -                   |
|                                                                                                    |         | Clearly define all outcomes, exposures, predictors, potential confounders, and effect modifiers. Give diagnostic criteria, if applicable                                                   | 6-7                 |
| Data sources/measurement                                                                           | 8*      | For each variable of interest, give sources of data and details of methods of assessment (measurement). Describe comparability of assessment methods if there is more than one group       | 6-7                 |
| Bias                                                                                               | 9       | Describe any efforts to address potential sources of bias                                                                                                                                  | 7                   |
| Study size                                                                                         | 10      | Explain how the study size was arrived at                                                                                                                                                  | 5-6                 |
| Quantitative variables                                                                             | 11      | Explain how quantitative variables were handled in the analyses. If applicable, describe which groupings were chosen and why                                                               | 6-7                 |
|                                                                                                    |         | (a) Describe all statistical methods, including those used to control for confounding                                                                                                      | 7                   |
|                                                                                                    |         | (b) Describe any methods used to examine subgroups and interactions                                                                                                                        | 7                   |
|                                                                                                    |         | (c) Explain how missing data were addressed                                                                                                                                                | -                   |
|                                                                                                    |         | (d) <i>Cohort study</i> —If applicable, explain how loss to follow-up was addressed                                                                                                        | NA                  |
| <i>Case-control study</i> —If applicable, explain how matching of cases and controls was addressed |         |                                                                                                                                                                                            |                     |
| Statistical methods                                                                                | 12      | <i>Cross-sectional study</i> —If applicable, describe analytical methods taking account of sampling strategy                                                                               | -                   |
|                                                                                                    |         | (e) Describe any sensitivity analyses                                                                                                                                                      | -                   |

| Section/Topic            | Item No | Recommendation                                                                                                                                                                                               | Reported on Page No |
|--------------------------|---------|--------------------------------------------------------------------------------------------------------------------------------------------------------------------------------------------------------------|---------------------|
| <b>Results</b>           |         |                                                                                                                                                                                                              |                     |
| Participants             | 13*     | (a) Report numbers of individuals at each stage of study—eg numbers potentially eligible, examined for eligibility, confirmed eligible, included in the study, completing follow-up, and analysed            | 6                   |
|                          |         | (b) Give reasons for non-participation at each stage                                                                                                                                                         | 6                   |
|                          |         | (c) Consider use of a flow diagram                                                                                                                                                                           | -                   |
| Descriptive data         | 14*     | (a) Give characteristics of study participants (eg demographic, clinical, social) and information on exposures and potential confounders                                                                     | 20                  |
|                          |         | (b) Indicate number of participants with missing data for each variable of interest                                                                                                                          | -                   |
|                          |         | (c) <i>Cohort study</i> —Summarise follow-up time (eg, average and total amount)                                                                                                                             | -                   |
| Outcome data             | 15*     | <i>Cohort study</i> —Report numbers of outcome events or summary measures over time                                                                                                                          | 21                  |
|                          |         | <i>Case-control study</i> —Report numbers in each exposure category, or summary measures of exposure                                                                                                         | -                   |
|                          |         | <i>Cross-sectional study</i> —Report numbers of outcome events or summary measures                                                                                                                           | 8,21                |
| Main results             | 16      | (a) Give unadjusted estimates and, if applicable, confounder-adjusted estimates and their precision (eg, 95% confidence interval). Make clear which confounders were adjusted for and why they were included | 21-24               |
|                          |         | (b) Report category boundaries when continuous variables were categorized                                                                                                                                    | -                   |
|                          |         | (c) If relevant, consider translating estimates of relative risk into absolute risk for a meaningful time period                                                                                             | -                   |
| Other analyses           | 17      | Report other analyses done—eg analyses of subgroups and interactions, and sensitivity analyses                                                                                                               | 7-9                 |
| <b>Discussion</b>        |         |                                                                                                                                                                                                              |                     |
| Key results              | 18      | Summarise key results with reference to study objectives                                                                                                                                                     | 9-12                |
| Limitations              | 19      | Discuss limitations of the study, taking into account sources of potential bias or imprecision. Discuss both direction and magnitude of any potential bias                                                   | 12-13               |
| Interpretation           | 20      | Give a cautious overall interpretation of results considering objectives, limitations, multiplicity of analyses, results from similar studies, and other relevant evidence                                   | 9-12                |
| Generalisability         | 21      | Discuss the generalisability (external validity) of the study results                                                                                                                                        | 12                  |
| <b>Other Information</b> |         |                                                                                                                                                                                                              |                     |
| Funding                  | 22      | Give the source of funding and the role of the funders for the present study and, if applicable, for the original study on which the present article is based                                                | 14                  |

\*Give information separately for cases and controls in case-control studies and, if applicable, for exposed and unexposed groups in cohort and cross-sectional studies.

**Note:** An Explanation and Elaboration article discusses each checklist item and gives methodological background and published examples of transparent reporting. The STROBE checklist is best used in conjunction with this article (freely available on the Web sites of PLoS Medicine at <http://www.plosmedicine.org/>, Annals of Internal Medicine at <http://www.annals.org/>, and Epidemiology at <http://www.epidem.com/>). Information on the STROBE Initiative is available at [www.strobe-statement.org](http://www.strobe-statement.org).
