# Supplementary material for: Prevalence and correlates of smoking and nicotine dependence: results of a nationwide cross-sectional survey among Singapore residents
Source: PubMed Central journal article supplement — BMJ Open. 2019 Oct 18;9(10):e032198. doi: 10.1136/bmjopen-2019-032198 (PMC6803088; doi:10.1136/bmjopen-2019-032198), 2019-10-18
Supplement: bmjopen-2019-032198supp001.pdf [file bmjopen-2019-032198supp001.pdf]

## Supplementary Tables

Supplementary Table 1. Prevalence of current smokers, ex-smokers, nicotine dependence by age group and gender

|                     | Males       |             |             | Females    |            |                  |
|---------------------|-------------|-------------|-------------|------------|------------|------------------|
|                     | 2010        | 2016        | p value     | 2010       | 2016       | p value          |
| Current smokers     |             |             |             |            |            |                  |
| 18-34               | 31.1        | 28.1        | 0.27        | 9.3        | 8.1        | 0.44             |
| 35-49               | 25.9        | 28.9        | 0.31        | 5.6        | 6.2        | 0.71             |
| 50-64               | 24.8        | 28.5        | 0.24        | 2.3        | 3.3        | 0.46             |
| 65+                 | 23.1        | 17.0        | 0.08        | 1.6        | 1.0        | 0.64             |
| Ex-smokers          |             |             |             |            |            |                  |
| 18-34               | 8.3         | 9.3         | 0.59        | 5.4        | 7.0        | 0.24             |
| 35-49               | 16.9        | 16.9        | 0.99        | 3.8        | 5.2        | 0.27             |
| 50-64               | 20.5        | 18.0        | 0.39        | 2.9        | 3.8        | 0.48             |
| 65+                 | <b>39.2</b> | <b>26.9</b> | <b>0.02</b> | 6.9        | 3.0        | 0.10             |
| Nicotine dependence |             |             |             |            |            |                  |
| 18-34               | 8.1         | 6.4         | 0.25        | 2.1        | 1.7        | 0.60             |
| 35-49               | 7.1         | 6.1         | 0.54        | <b>2.1</b> | <b>0.4</b> | <b>&lt;0.001</b> |
| 50-64               | 7.6         | 6.1         | 0.39        | 1.4        | 0.5        | 0.19             |
| 65+                 | 6.9         | 3.6         | 0.17        | .          | .          | .                |

Chi square analysis; (.) denotes missing or less than 5 cases

Supplementary Table 2a. Sociodemographic correlates of current and former smoking status among males

|                  |                              | Current smoker vs Non-smoker |            |             |                  | Ex-smoker versus Non-smoker |            |            |              |
|------------------|------------------------------|------------------------------|------------|-------------|------------------|-----------------------------|------------|------------|--------------|
|                  |                              | OR                           | 95% CI     |             | P value          | OR                          | 95% CI     |            | P value      |
| Age group        | 18-34                        | Ref                          |            |             |                  | Ref                         |            |            |              |
|                  | 35-49                        | 1.3                          | 0.8        | 2.0         | 0.321            | <b>2.0</b>                  | <b>1.2</b> | <b>3.5</b> | <b>0.013</b> |
|                  | <b>50-64</b>                 | <b>0.6</b>                   | <b>0.3</b> | <b>0.9</b>  | <b>0.028</b>     | 1.4                         | 0.8        | 2.4        | 0.270        |
|                  | <b>65 and above</b>          | <b>0.3</b>                   | <b>0.2</b> | <b>0.6</b>  | <b>0.001</b>     | 1.4                         | 0.8        | 2.7        | 0.272        |
| Ethnicity        | Chinese                      | Ref                          |            |             |                  | Ref                         |            |            |              |
|                  | <b>Malay</b>                 | <b>2.7</b>                   | <b>2.0</b> | <b>3.5</b>  | <b>&lt;0.001</b> | <b>2.1</b>                  | <b>1.6</b> | <b>2.9</b> | <b>0.000</b> |
|                  | <b>Indian</b>                | <b>1.4</b>                   | <b>1.1</b> | <b>1.9</b>  | <b>0.010</b>     | 1.2                         | 0.9        | 1.6        | 0.298        |
|                  | Others                       | 1.4                          | 0.9        | 2.3         | 0.123            | <b>1.6</b>                  | <b>1.0</b> | <b>2.6</b> | <b>0.041</b> |
| Marital          | Single                       | Ref                          |            |             |                  | Ref                         |            |            |              |
|                  | Married                      | 0.9                          | 0.6        | 1.4         | 0.657            | 1.1                         | 0.7        | 1.9        | 0.602        |
|                  | Divorced/Separated           | 1.6                          | 0.7        | 3.8         | 0.296            | 2.1                         | 0.9        | 5.3        | 0.104        |
|                  | Widowed                      | 2.0                          | 0.5        | 7.1         | 0.301            | 0.6                         | 0.1        | 2.2        | 0.399        |
| Education        | <b>Primary</b>               | <b>13.3</b>                  | <b>7.0</b> | <b>25.3</b> | <b>&lt;0.001</b> | <b>5.0</b>                  | <b>2.7</b> | <b>9.3</b> | <b>0.000</b> |
|                  | <b>Secondary</b>             | <b>6.3</b>                   | <b>3.7</b> | <b>10.8</b> | <b>&lt;0.001</b> | <b>3.3</b>                  | <b>2.0</b> | <b>5.5</b> | <b>0.000</b> |
|                  | Pre-U/JC/Diploma             | 1.9                          | 0.8        | 4.5         | 0.125            | 1.3                         | 0.6        | 3.0        | 0.544        |
|                  | <b>Vocational/ITE</b>        | <b>7.4</b>                   | <b>4.2</b> | <b>12.8</b> | <b>&lt;0.001</b> | <b>3.3</b>                  | <b>1.7</b> | <b>6.4</b> | <b>0.000</b> |
|                  | <b>Diploma</b>               | <b>2.8</b>                   | <b>1.7</b> | <b>4.5</b>  | <b>&lt;0.001</b> | <b>2.4</b>                  | <b>1.5</b> | <b>4.1</b> | <b>0.001</b> |
| Employment       | University                   | Ref                          |            |             |                  | Ref                         |            |            |              |
|                  | Employed                     | Ref                          |            |             |                  | Ref                         |            |            |              |
|                  | <b>Economically inactive</b> | <b>0.4</b>                   | <b>0.3</b> | <b>0.7</b>  | <b>0.001</b>     | 1.2                         | 0.8        | 2.0        | 0.401        |
|                  | Unemployed                   | 1.0                          | 0.6        | 1.9         | 0.924            | 1.2                         | 0.6        | 2.5        | 0.557        |
| Household Income | <SGD 2000                    | Ref                          |            |             |                  |                             |            |            |              |
|                  | SGD 2000-3999                | 1.0                          | 0.6        | 1.5         | 0.920            | 0.7                         | 0.4        | 1.3        | 0.257        |
|                  | SGD 4000-5999                | 0.9                          | 0.5        | 1.4         | 0.548            | 0.8                         | 0.5        | 1.4        | 0.385        |
|                  | SGD 6000-9999                | 0.9                          | 0.6        | 1.6         | 0.810            | 0.9                         | 0.5        | 1.6        | 0.708        |
|                  | <b>≥SGD 10 000</b>           | <b>0.5</b>                   | <b>0.3</b> | <b>1.0</b>  | <b>0.048</b>     | 1.1                         | 0.6        | 2.1        | 0.667        |

Multinomial logistic regression analysis controlled for potential confounders including age,

ethnicity, marital status, education, employment and household income.

Supplementary Table 2b. Sociodemographic correlates of current and former smoking status among females

|                  |                              | Current smoker vs Non-smoker |            |             |                  | Ex-smoker versus Non-smoker |            |            |              |
|------------------|------------------------------|------------------------------|------------|-------------|------------------|-----------------------------|------------|------------|--------------|
|                  |                              | OR                           | 95% CI     |             | p value          | OR                          | 95% CI     |            | p value      |
| Age group        | 18-34                        | Ref                          |            |             |                  | Ref                         |            |            |              |
|                  | 35-49                        | 0.4                          | 0.2        | 0.9         | 0.019            | <b>0.4</b>                  | <b>0.2</b> | <b>0.8</b> | <b>0.016</b> |
|                  | <b>50-64</b>                 | <b>0.1</b>                   | <b>0.0</b> | <b>0.3</b>  | <b>&lt;0.001</b> | <b>0.2</b>                  | <b>0.1</b> | <b>0.5</b> | <b>0.001</b> |
|                  | <b>65 and above</b>          | <b>0.1</b>                   | <b>0.0</b> | <b>0.3</b>  | <b>&lt;0.001</b> | <b>0.1</b>                  | <b>0.0</b> | <b>0.4</b> | <b>0.001</b> |
| Ethnicity        | Chinese                      | Ref                          |            |             |                  | Ref                         |            |            |              |
|                  | <b>Malay</b>                 | <b>1.9</b>                   | <b>1.2</b> | <b>3.0</b>  | <b>0.005</b>     | 1.7                         | 1.0        | 2.7        | 0.032        |
|                  | Indian                       | 1.3                          | 0.8        | 2.2         | 0.300            | 1.0                         | 0.6        | 1.6        | 0.904        |
|                  | <b>Others</b>                | <b>2.3</b>                   | <b>1.1</b> | <b>5.1</b>  | <b>0.033</b>     | <b>2.5</b>                  | <b>1.3</b> | <b>4.8</b> | <b>0.005</b> |
| Marital          | Single                       | Ref                          |            |             |                  | Ref                         |            |            |              |
|                  | Married                      | 0.6                          | 0.3        | 1.2         | 0.138            | 1.4                         | 0.7        | 2.8        | 0.381        |
|                  | Divorced/Separated           | 2.3                          | 1.0        | 5.4         | 0.064            | <b>3.5</b>                  | <b>1.3</b> | <b>9.5</b> | <b>0.013</b> |
|                  | <b>Widowed</b>               | <b>0.2</b>                   | <b>0.0</b> | <b>0.7</b>  | <b>0.010</b>     | 2.3                         | 0.7        | 8.1        | 0.187        |
| Education        | <b>Primary</b>               | <b>22.3</b>                  | <b>6.4</b> | <b>78.1</b> | <b>&lt;0.001</b> | <b>3.2</b>                  | <b>1.2</b> | <b>8.5</b> | <b>0.021</b> |
|                  | <b>Secondary</b>             | <b>13.6</b>                  | <b>4.6</b> | <b>39.8</b> | <b>&lt;0.001</b> | 1.7                         | 0.7        | 4.0        | 0.242        |
|                  | Pre-U/JC/Diploma             | 0.3                          | 0.0        | 2.2         | 0.216            | 1.9                         | 0.6        | 5.6        | 0.260        |
|                  | <b>Vocational/ITE</b>        | <b>8.1</b>                   | <b>2.9</b> | <b>22.3</b> | <b>&lt;0.001</b> | <b>3.3</b>                  | <b>1.3</b> | <b>8.5</b> | <b>0.011</b> |
|                  | <b>Diploma</b>               | <b>4.6</b>                   | <b>1.7</b> | <b>11.9</b> | <b>0.002</b>     | 0.8                         | 0.4        | 1.8        | 0.574        |
|                  | University                   | Ref                          |            |             |                  | Ref                         |            |            |              |
| Employment       | Employed                     | Ref                          |            |             |                  | Ref                         |            |            |              |
|                  | <b>Economically inactive</b> | <b>0.2</b>                   | <b>0.1</b> | <b>0.4</b>  | <b>&lt;0.001</b> | 0.7                         | 0.4        | 1.2        | 0.176        |
|                  | Unemployed                   | 0.8                          | 0.3        | 2.2         | 0.645            | 0.5                         | 0.2        | 1.5        | 0.207        |
| Household Income | <SGD 2000                    |                              |            |             |                  |                             |            |            |              |
|                  | <b>SGD 2000-3999</b>         | <b>0.5</b>                   | <b>0.2</b> | <b>0.9</b>  | <b>0.035</b>     | 0.9                         | 0.5        | 1.7        | 0.714        |
|                  | SGD 4000-5999                | 0.5                          | 0.3        | 1.1         | 0.073            | 1.3                         | 0.6        | 2.5        | 0.497        |
|                  | SGD 6000-9999                | 0.7                          | 0.3        | 1.6         | 0.418            | 1.1                         | 0.5        | 2.4        | 0.888        |
|                  | ≥SGD 10 000                  | 0.9                          | 0.3        | 2.2         | 0.760            | 0.8                         | 0.3        | 2.1        | 0.645        |

Multinomial logistic regression analysis controlled for potential confounders including age, ethnicity, marital status, education, employment and household income.

Supplementary Table 3a. Sociodemographic correlates of Nicotine Dependence among Males

|                  |                              | OR          | 95% CI     |              | P value          |
|------------------|------------------------------|-------------|------------|--------------|------------------|
| Age group        | 18-34                        | Ref         |            |              |                  |
|                  | 35-49                        | 0.9         | 0.5        | 1.6          | 0.666            |
|                  | <b>50-64</b>                 | <b>0.4</b>  | <b>0.2</b> | <b>0.9</b>   | <b>0.018</b>     |
|                  | 65 and above                 | 0.3         | 0.1        | 0.9          | 0.038            |
| Ethnicity        | Chinese                      | Ref         |            |              |                  |
|                  | Malay                        | 1.4         | 0.9        | 2.2          | 0.163            |
|                  | Indian                       | 1.3         | 0.8        | 2.1          | 0.343            |
|                  | Others                       | 1.2         | 0.5        | 3.3          | 0.701            |
| Marital          | Single                       | Ref         |            |              |                  |
|                  | Married                      | 0.8         | 0.4        | 1.4          | 0.432            |
|                  | Divorced/Separated           | 1.0         | 0.2        | 1.8          | 0.415            |
|                  | Widowed                      | 3.3         | 0.7        | 15.7         | 0.134            |
| Education        | <b>Primary</b>               | <b>33.0</b> | <b>6.3</b> | <b>171.8</b> | <b>&lt;0.001</b> |
|                  | <b>Secondary</b>             | <b>21.1</b> | <b>4.6</b> | <b>97.4</b>  | <b>&lt;0.001</b> |
|                  | Pre-U/JC/                    | 1.5         | 0.3        | 8.5          | 0.622            |
|                  | <b>Vocational/ITE</b>        | <b>16.1</b> | <b>3.5</b> | <b>72.9</b>  | <b>&lt;0.001</b> |
|                  | Diploma                      | 8.0         | 1.9        | 34.2         | 0.005            |
|                  | University                   | Ref         |            |              |                  |
| Employment       | Employed                     | Ref         |            |              |                  |
|                  | <b>Economically inactive</b> | <b>0.2</b>  | <b>0.1</b> | <b>0.4</b>   | <b>&lt;0.001</b> |
|                  | Unemployed                   | 0.6         | 0.3        | 1.7          | 0.362            |
| Household Income | Below SGD 2000               | Ref         |            |              |                  |
|                  | SGD 2000-3900                | 0.8         | 0.4        | 1.5          | 0.558            |
|                  | <b>SGD 4000-5999</b>         | <b>0.4</b>  | <b>0.2</b> | <b>0.9</b>   | <b>0.031</b>     |
|                  | SGD 6000-9999                | 0.6         | 0.2        | 1.4          | 0.199            |
|                  | 10 000 and above             | 0.6         | 0.2        | 1.8          | 0.318            |

Multiple logistic regression analysis controlled for potential confounders including age, ethnicity, marital status, education, employment and household income.

Supplementary Table 3b. Sociodemographic correlates of Nicotine Dependence among Females

|                  |                       | OR           | 95%<br>CI  |               | P<br>value       |
|------------------|-----------------------|--------------|------------|---------------|------------------|
| Age group        | 18-34                 | Ref          |            |               |                  |
|                  | <b>35-49</b>          | <b>0.1</b>   | <b>0.0</b> | <b>0.3</b>    | <b>&lt;0.001</b> |
|                  | <b>50-64</b>          | <b>0.1</b>   | <b>0.0</b> | <b>0.5</b>    | <b>0.004</b>     |
|                  | 65 and above          | .            | .          | .             | .                |
| Ethnicity        | Chinese               | Ref          |            |               |                  |
|                  | Malay                 | 1.9          | 0.7        | 5.6           | 0.224            |
|                  | Indian                | 1.5          | 0.4        | 5.4           | 0.522            |
|                  | Others                | 2.3          | 0.4        | 14.4          | 0.389            |
| Marital          | Single                | Ref          |            |               |                  |
|                  | Married               | 0.8          | 0.2        | 3.5           | 0.812            |
|                  | Divorced/Separated    | 1.7          | 0.4        | 7.3           | 0.479            |
|                  | Widowed               | .            | .          | .             | .                |
| Education        | <b>Primary</b>        | <b>103.0</b> | <b>8.3</b> | <b>1272.6</b> | <b>&lt;0.001</b> |
|                  | <b>Secondary</b>      | <b>61.8</b>  | <b>7.4</b> | <b>514.9</b>  | <b>&lt;0.001</b> |
|                  | Pre-U/JC/             | 13.3         | 0.8        | 218.8         | 0.070            |
|                  | Vocational/ITE        | 4.3          | 0.3        | 69.3          | 0.304            |
|                  | <b>Diploma</b>        | <b>36.8</b>  | <b>4.3</b> | <b>314.1</b>  | <b>0.001</b>     |
|                  | University            | Ref          |            |               |                  |
| Employment       | Employed              | Ref          |            |               |                  |
|                  | Economically inactive | .            | .          | .             | .                |
|                  | Unemployed            | 0.6          | 0.2        | 2.4           | 0.489            |
| Household Income | Below SGD 2000        | Ref          |            |               |                  |
|                  | SGD 2000-3900         | 1.0          | 0.3        | 3.8           | 0.987            |
|                  | <b>SGD 4000-5999</b>  | <b>0.0</b>   | <b>0.0</b> | <b>0.5</b>    | <b>0.010</b>     |
|                  | SGD 6000-9999         | 1.1          | 0.3        | 4.1           | 0.914            |
|                  | 10 000 and above      | 0.4          | 0.1        | 2.1           | 0.300            |

Multiple logistic regression analysis controlled for potential confounders including

age, ethnicity, marital status, education, employment and household income.

(.) denotes missing or less than 5 cases
